# Supplementary material for: Longitudinal analyses of gender differences in first authorship publications related to COVID-19
Source: PubMed Central journal article supplement — BMJ Open. 2021 Apr 5;11(4):e045176. doi: 10.1136/bmjopen-2020-045176 (PMC8025238; doi:10.1136/bmjopen-2020-045176), 2021-04-05
Supplement: bmjopen-2020-045176.draft_revisions.pdf [file bmjopen-2020-045176.draft_revisions.pdf]

# BMJ Open

BMJ Open is committed to open peer review. As part of this commitment we make the peer review history of every article we publish publicly available.

When an article is published we post the peer reviewers' comments and the authors' responses online. We also post the versions of the paper that were used during peer review. These are the versions that the peer review comments apply to.

The versions of the paper that follow are the versions that were submitted during the peer review process. They are not the versions of record or the final published versions. They should not be cited or distributed as the published version of this manuscript.

BMJ Open is an open access journal and the full, final, typeset and author-corrected version of record of the manuscript is available on our site with no access controls, subscription charges or pay-per-view fees (<http://bmjopen.bmj.com>).

If you have any questions on BMJ Open's open peer review process please email [info.bmjopen@bmj.com](mailto:info.bmjopen@bmj.com)

# BMJ Open

## Gender differences in publications related to COVID-19

|                               |                                                                                                                                                                                                        |
|-------------------------------|--------------------------------------------------------------------------------------------------------------------------------------------------------------------------------------------------------|
| Journal:                      | <i>BMJ Open</i>                                                                                                                                                                                        |
| Manuscript ID                 | bmjopen-2020-045176                                                                                                                                                                                    |
| Article Type:                 | Original research                                                                                                                                                                                      |
| Date Submitted by the Author: | 27-Sep-2020                                                                                                                                                                                            |
| Complete List of Authors:     | Lerchenmüller, Carolin; University Hospital Heidelberg, Schmallenbach, Leo; University of Mannheim Jena, Anupam; Harvard University, Health Care Policy Lerchenmueller, Marc ; University of Mannheim, |
| Keywords:                     | GENERAL MEDICINE (see Internal Medicine), COVID-19, Health policy < HEALTH SERVICES ADMINISTRATION & MANAGEMENT                                                                                        |
|                               |                                                                                                                                                                                                        |

SCHOLARONE™  
Manuscripts

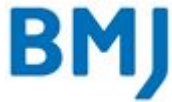

I, the Submitting Author has the right to grant and does grant on behalf of all authors of the Work (as defined in the below author licence), an exclusive licence and/or a non-exclusive licence for contributions from authors who are: i) UK Crown employees; ii) where BMJ has agreed a CC-BY licence shall apply, and/or iii) in accordance with the terms applicable for US Federal Government officers or employees acting as part of their official duties; on a worldwide, perpetual, irrevocable, royalty-free basis to BMJ Publishing Group Ltd ("BMJ") its licensees and where the relevant Journal is co-owned by BMJ to the co-owners of the Journal, to publish the Work in this journal and any other BMJ products and to exploit all rights, as set out in our [licence](#).

The Submitting Author accepts and understands that any supply made under these terms is made by BMJ to the Submitting Author unless you are acting as an employee on behalf of your employer or a postgraduate student of an affiliated institution which is paying any applicable article publishing charge ("APC") for Open Access articles. Where the Submitting Author wishes to make the Work available on an Open Access basis (and intends to pay the relevant APC), the terms of reuse of such Open Access shall be governed by a Creative Commons licence – details of these licences and which [Creative Commons](#) licence will apply to this Work are set out in our licence referred to above.

Other than as permitted in any relevant BMJ Author's Self Archiving Policies, I confirm this Work has not been accepted for publication elsewhere, is not being considered for publication elsewhere and does not duplicate material already published. I confirm all authors consent to publication of this Work and authorise the granting of this licence.

## Gender differences in publications related to COVID-19

Carolin Lerchenmüller, MD,<sup>1,2,3</sup> Leo Schmallenbach, MSc,<sup>4</sup>  
Anupam B. Jena, MD,<sup>5,6,7\*</sup> PhD, Marc J. Lerchenmueller, MPH, PhD<sup>4,8\*</sup>

<sup>1</sup>Department of Cardiology, Angiology, Pulmonology, University Hospital Heidelberg, Germany

<sup>2</sup>German Center for Heart and Cardiovascular Research (DZHK), Partner Site Heidelberg/Mannheim, Germany

<sup>3</sup>Cardiology Division and Corrigan Minehan Heart Center, Massachusetts General Hospital, Boston, MA

<sup>4</sup>Area Management, University of Mannheim, Mannheim, Germany

<sup>5</sup>Department of Health Care Policy, Harvard Medical School Boston, MA

<sup>6</sup>Department of Medicine, Massachusetts General Hospital, Boston, MA

<sup>7</sup>National Bureau of Economic Research, Cambridge, MA

<sup>8</sup>School of Management, Yale University, New Haven, CT

\*These authors contributed equally

Word count: 1795

Keywords: COVID-19, Health policy, Gender equity

### Corresponding author:

Carolin Lerchenmueller, MD

Department of Cardiology, Angiology, Pulmonology

University Hospital Heidelberg

INF 410

69120 Heidelberg, Germany

Email: carolin.lerchenmueller@med.uni-heidelberg.de

## Gender differences in publications related to COVID-19

### Abstract

**Objective:** When concerns have been raised that the COVID-19 pandemic has disproportionately involved male scientific authors, potentially to the disadvantage of women's careers and societies' response to the pandemic, we sought to investigate the gender distribution of first authorships for publications on COVID-19.

**Methods and Results:** We compared gender distribution of first authorships for publications on COVID-19 from 2020 versus publications appearing in the same journals during the previous year and find that the gender gap widens by 18 percentage points with the COVID-19 pandemic. Globally, female researchers' productivity goes down in relation to their male peers across all continents.

**Conclusion:** The reduction in women's research output regarding COVID-19 appears particularly concerning as many disciplines informing the response to the pandemic had near equal gender shares of first authorship in 2019. Academic and funding institutions may need to consider potential remedies to mitigate the pandemic's negative effect on women's scientific productivity.

### Strengths and limitations of this study

- Using a natural experiment design, this study provides evidence for a ~3.5x increase in the gender gap among leading authors on 27,821 COVID-19 publications relative to a set of 365,914 control articles appearing in the same journals the previous year
- Particularly fields that are pertinent to addressing the pandemic, like virology, infectious diseases, public health, and internal medicine, show a pronounced slump in women's productivity as the pandemic unfolds
- With fewer women contributing to COVID-19 research than one would expect, concerns mount that the academic community can offer the best ideas for addressing the pandemic
- To our knowledge, this is the most up to date and the largest study investigating gender differences in first authorships of COVID publications, including data from articles published between February 1<sup>st</sup>, and September 10<sup>th</sup>
- Our large-scale study design does not allow, however, to discern the multifactorial mechanisms leading to the decline in women's productivity, which may range from displaced work hours needed for child care to gender differences in the allocation of COVID-19 funding schemes

## Introduction

It is now widely accepted that women are integral to productive and innovative science communities (1, 2). Nonetheless, women remain underrepresented in prestigious author positions on publications in the life sciences and medicine (3), are less likely to be promoted to higher academic ranks, and are paid less, despite the continuously growing number of female academics in those fields (4). Projections indicate that this gap will persist if targeted interventions are not implemented (5).

It is in this setting that concerns have been raised that research and expert reporting on the COVID-19 (Coronavirus Disease 2019, COVID) pandemic has disproportionately involved male scientific authors, at least in part because closures of academic institutions, schools, and childcare facilities likely have led to greater household responsibilities borne by female scientists (6, 7). Consistent with this, previous research has shown that parental leaves taken by men often result in increased productivity, while no such phenomenon can be observed for women, suggesting that working women still contribute significantly to childrearing and household tasks (8). These dynamics likely affect early-career female scholars disproportionately.

The proliferation of COVID related publications provide a unique window into these gendered dynamics for two reasons. First, COVID publications have been produced rapidly under unusual conditions that likely disfavor female scientists relative to usual conditions that can serve as a control, offering a natural experiment setting. Second, COVID publications are mainly produced in the life sciences and medicine where long-standing authorship standards reserve the first author position to early career investigators, which allows estimating the effect for this group in particular. In this study, we assessed the pandemic's effect on women's COVID-related scientific publishing worldwide.

## Methods

We compared the gender composition of 27,821 PubMed-indexed articles published between February 1st and September 10th, 2020 that included the term “COVID” in the title or the abstract to the gender composition of 365,914 articles published in the same journals during the same period in 2019 (see **Supplementary Materials** for data and methods). We allocated 2,618 represented journals to scientific disciplines based on Clarivate journal categories and determined author gender with the Genderize database (9). We assessed changes in the gender composition of authors between periods (COVID and pre-COVID) within scientific discipline (e.g., medicine/internal medicine, infectious diseases, virology, etc.), to account for the possibility that the scientific areas in which COVID research has predominantly been published may at baseline (i.e. pre-COVID) have had disproportionately more male authors. We also used detailed affiliation data to determine the geographic locale of the first author.

## Patient and Public Involvement

No patients were involved in setting the research question or the outcome measures, nor were they involved in developing plans for design or implementation of the study. No patients were asked to advise on the interpretation or write up of the results. There are no plans to disseminate the results of the research to study participants or the relevant patient community.

## Results

Our data shows that disciplines producing most COVID-relevant publications had near equal gender shares of first authorship pre-COVID. For example, in the fields



1  
2  
3 of virology, general/internal medicine, and infectious diseases, the proportions of first  
4 authors who were female prior to COVID were 52%, 45%, and 49%, respectively. The  
5 share of female first authors in relevant fields like public environmental and  
6 occupational health was even higher (58%). However, significant reductions in female  
7 first authorships have occurred in almost all disciplines, including the above, since the  
8 pandemic began. Across all disciplines that published research related to COVID, we  
9 found that the average gender gap in first authorships was 7% (54% male vs 46% female  
10 first authors) in 2019, rising to 25% (63% male vs 37% female first authors) for COVID  
11 related research. The average gender gap in first authorships has thus risen by 18  
12 percentage points in the wake of the pandemic (**Figure 1**). In the fields of virology,  
13 general/internal medicine, and infectious diseases in particular, the gender rift in first  
14 authorships has widened above average (29, 18, and 20 percentage points, respectively),  
15 while there was no gap in the control group (**Figure 1**). The previously female first  
16 author-dominated field of public environmental and occupational health now presents  
17 a gender gap of 18% (total increase from pre-COVID of 34 percentage points) (**Figure**  
18 **1**).

19  
20  
21  
22  
23  
24  
25  
26  
27  
28  
29  
30  
31  
32  
33  
34  
35  
36  
37  
38  
39  
40 Since the pandemic has affected countries differently, we further performed  
41 analyses based on the country affiliation of the first author. Female researchers'  
42 productivity goes down in relation to their male peers across all continents. Publishing  
43 activity by women located in Brazil, for example, is reduced by 36%, the average  
44 reduction of first authorships in Europe, where the pandemic first gathered speed, is  
45 31% (**Figure 2**). In Canada and the United States, the reduction to date is 10% and 22%,  
46 respectively (**Figure 2**).

## Discussion

Our results provide the largest and latest systematic evidence for the COVID pandemic's effect on women's publishing productivity across disciplines worldwide. In light of previous research and observations (6-8, 10), we suspect that the overcontribution of women to household and child rearing responsibilities that leaves less opportunity to participate in writing, submitting and publishing research related to COVID-19 leads to the reduced productivity of women as borne out by our data. Despite at an early stage and still during an ongoing pandemic, these results already suggest cause for concern, both on the individual and societal level. Our findings indicate that the current scientific/medical response to one of the most incisive global crises is overly male dominated, particularly when considering that the fields being called upon to offer scientific insights have historically had more gender balance in scientific representation. The present effects may be amplified as the pandemic wanes on and perceptions of women at earlier career stages may lead them to be less often allocated to leading roles on projects in the current circumstances.

Women are a vital part of the research and medical enterprise, impacting patient care, science and society. To avoid long-term impacts on the academic advancement and scientific contributions, the disproportionate impact of COVID-19 on early career women investigators needs serious consideration. As a first step, the problem needs to be openly and consciously discussed. Naturally, pre-existing inequities must be evaluated, and a long-term strategy has to be established to support equity and inclusion in science (11). But more acutely, COVID-related gender inequities need to be addressed with direct measures, monetary and non-monetary, on both the political (e.g. federal funding agencies) and institutional level. For example, modifications for grant deadlines, timelines, extensions for granted expenses, as well as additional (bridge)

1  
2  
3 funding programs, are likely warranted (12). Extension of tenure evaluation and  
4  
5 promotion should be considered on the individual level accounting for constraints  
6  
7 posed by COVID. Resources for childcare should be provided for parents, additional  
8  
9 funds for expanded childcare arrangements could help to reallocate time to regular  
10  
11 professional duties. Financial support for postdoctoral/graduate students could help to  
12  
13 facilitate a research set-back in a recently established laboratory.  
14  
15

16  
17 Without policy interventions, our communities may miss out on some of the  
18  
19 best ideas for tackling the pandemic, across scientific/medical disciplines and  
20  
21 potentially beyond in other professions.  
22  
23  
24  
25  
26  
27  
28  
29  
30  
31  
32  
33  
34  
35  
36  
37  
38  
39  
40  
41  
42  
43  
44  
45  
46  
47  
48  
49  
50  
51  
52  
53  
54  
55  
56  
57  
58  
59  
60

## References

1. World Economic Forum, The Global Gender Gap Report 2017. [http://www3.weforum.org/docs/WEF\\_GGGR\\_2017.pdf](http://www3.weforum.org/docs/WEF_GGGR_2017.pdf) (accessed 08 June 2018), (2017).
2. K. R. O'Brien, M. Scheffer, E. H. van Nes, R. van der Lee, How to Break the Cycle of Low Workforce Diversity: A Model for Change. *PloS one* **10**, (2015).
3. C. Lerchenmuller, M. J. Lerchenmueller, O. Sorenson, Long-Term Analysis of Sex Differences in Prestigious Authorships in Cardiovascular Research Supported by the National Institutes of Health. *Circulation* **137**, 880-882 (2018).
4. D. M. Blumenthal *et al.*, Sex Differences in Faculty Rank Among Academic Cardiologists in the United States. *Circulation* **135**, 506-517 (2017).
5. L. Holman, D. Stuart-Fox, C. E. Hauser, The gender gap in science: How long until women are equally represented? *PLoS Biol* **16**, e2004956 (2018).
6. C. Kitchener, in *The Lily / The Washington Post*. (thelily.com, 2020).
7. F. Staniscuaski *et al.*, Impact of COVID-19 on academic mothers. *Science* **368**, 724 (2020).
8. H. Antecol, K. Bedard, J. Stearns, Equal but Inequitable: Who Benefits from Gender-Neutral Tenure Clock Stopping Policies? *American Economic Review* **108**, 2420-2441 (2018).
9. V. Lariviere, C. Ni, Y. Gingras, B. Cronin, C. R. Sugimoto, Bibliometrics: global gender disparities in science. *Nature* **504**, 211-213 (2013).
10. Boston Consulting Group. Easing the covid-19 burden on working parents. <https://www.bcg.com/en-us/publications/2020/helping-working-parents-ease-the-burden-of-covid-19.aspx> (accessed 14 September 2020), (2020).
11. J. L. Malisch *et al.*, Opinion: In the wake of COVID-19, academia needs new solutions to ensure gender equity. *Proceedings of the National Academy of Sciences of the United States of America* **117**, 15378-15381 (2020).
12. E. M. Gibson *et al.*, How Support of Early Career Researchers Can Reset Science in the Post-COVID19 World. *Cell* **181**, 1445-1449 (2020).

### **Availability of data and materials**

The datasets generated and analysed during the current study are available from the corresponding author.

### **Conflicts of interest**

Dr. Jena reports receiving consulting fees unrelated to this work from Pfizer, Hill Rom Services, Bristol Myers Squibb, Novartis, Amgen, Eli Lilly, Vertex Pharmaceuticals, AstraZeneca, Celgene, Tesaro, Sanofi Aventis, Biogen, Precision Health Economics, and Analysis Group.

### **Funding**

Support was provided by the Office of the Director, National Institutes of Health (1DP5OD017897, Dr. Jena). The funding sources had no role in the design and conduct of the study; collection, management, analysis, and interpretation of the data; and preparation, review, or approval of the manuscript.

### **Author's contributions**

LS and MJL collected data, LS, MJL and CL performed data analysis. CL, MJL, ABJ wrote the manuscript, LS edited the manuscript. All authors read and approved the final manuscript. Patients and public did not contribute to the study.

### **Acknowledgements**

The authors acknowledge support by the German state of Baden-Württemberg through bwHPC—high performance cluster computing resources.

### Supplementary Materials

Detailed methods and supporting data are available in the supplementary materials. All data and source code will be made publicly available with publication of this article.

For peer review only

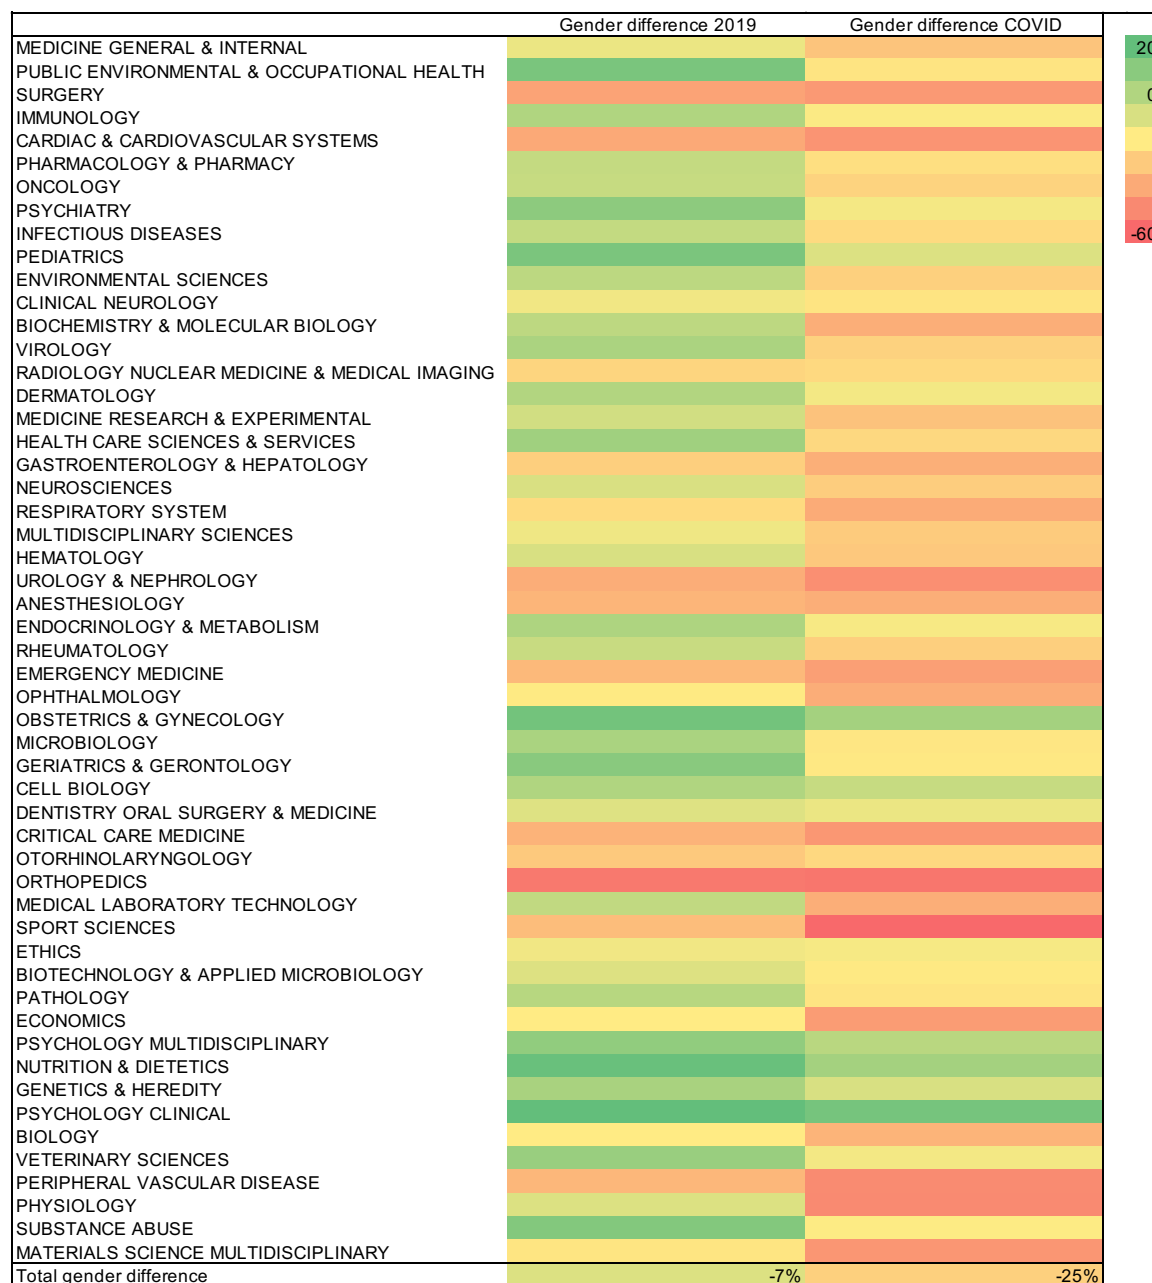

**Figure 1. Reduction in female first authorships during the COVID-19 pandemic by discipline**

Heatmap depicting the percentage share of female vs. male first authorships for COVID-19 publications and control publications during the same period in 2019 in COVID-intensive disciplines (≥ 55 articles, descending frequency from top to bottom). Overall difference in female (compared to male) first authorships in %.

### % Reduction Female First Authorships COVID

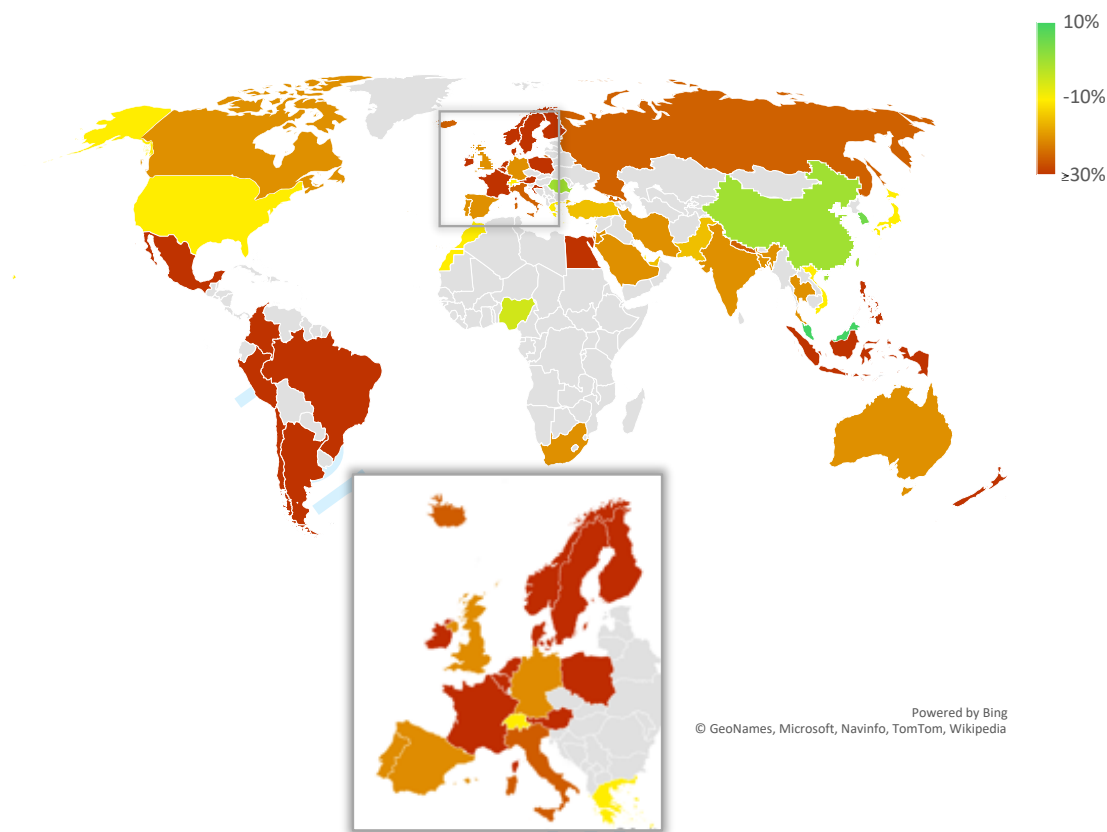

#### **Figure 2. Reduction in female first authorships during the COVID-19 pandemic by country**

Worldmap depicting the change in the gender gap in first authorship (percent female first authorship minus percent male first authorship) for COVID publications versus non-COVID publications. Included countries had at least 30 COVID publications up to September 10<sup>th</sup>, 2020.



1  
2  
3  
4  
5  
6  
7  
8  
9  
10  
11  
12  
13  
14  
15  
16  
17  
18  
19  
20  
21  
22  
23  
24  
25  
26  
27  
28  
29  
30  
31  
32  
33  
34  
35  
36  
37  
38  
39  
40  
41  
42  
43  
44  
45  
46  
47  
48  
49  
50  
51  
52  
53  
54  
55  
56  
57  
58  
59  
60

**Supplementary materials for**  
**Gender differences in publications related to COVID-19**

Carolin Lerchenmüller, MD, Leo Schmallenbach, MSc,  
Anupam B. Jena, MD, PhD, Marc J. Lerchenmüller, MPH, PhD

**Table of Contents**

Additional information on data (page 2)

Additional information on methods (page 3)

References (page 4)

**Figure S1:** Sample construction for COVID articles and non-COVID (control) articles

**Figure S2:** Gender designation accuracy for COVID articles and non-COVID (control) articles for female and male first authors

**Figure S3:** Gender designation accuracy for first authors for COVID articles and non-COVID (control) articles separately

**Table S1:** Major disciplines for COVID articles and non-COVID (control) articles and concordance statistics

**Table S2:** Major countries for COVID articles and non-COVID (control) articles and concordance statistics

**Table S3:** Hierarchical linear probability model for the likelihood of female first authorship for COVID articles versus non-COVID (control) articles

**Table S4:** Hierarchical logistic regression for the likelihood of female first authorship for COVID articles versus non-COVID (control) articles

### Additional Information on Data

We merged several databases to analyze potential gender differences in first authorships of COVID publications relative to a set of control publications in the same journals in the prior year. First, we extracted all articles from the PubMed database for which the term “COVID” appeared in the title or abstract and obtained all available article characteristics including, among others, the names of all authors, country affiliation per author, the journal ISSN (International Standard Serial Number), and time of publication (months and year). The U.S. National Library of Medicine maintains the PubMed XML database and a detailed data inventory can be found here ([https://www.nlm.nih.gov/databases/download/pubmed\\_medline.html](https://www.nlm.nih.gov/databases/download/pubmed_medline.html)). We obtained the journals’ major scientific discipline from the Clarivate Journal Citation Report of 2018 via the unique journal ISSNs. We used journal names as a crosswalk to identify publications that appeared a year earlier in the exact same journals as the COVID articles.

An overview of the sample creation is provided in **Figure S1**. In service of estimation accuracy, we included only journals that are listed in Clarivate. By construction that excludes all COVID publications in journals that had no publication on record in PubMed for 2019. These journals likely only came into being in 2020. We restricted our search query to articles published between February 1<sup>st</sup> and September 10<sup>th</sup> of 2019, since these months were the most productive in terms of COVID publishing and we sought to mitigate seasonal influences, like gender differences in teaching load at certain times of year.

We used the forenames recorded in PubMed to designate the gender of authors (PubMed started to systematically record forenames in 2002). We determined the probable gender of the authors through the Genderize database, an established approach that allows gender assignment for a large number of authors. At the time of initial submission, Genderize included 86,710 distinct forenames drawn from 74 countries and 81 languages. Recent tests of the accuracy and comprehensiveness of four gender assignment algorithms, using a control sample of gender-matched forenames from a US government office, found that Genderize provided the most accurate estimates of gender (1). Our underlying code for calling the Genderize database with a large set of forenames has been posted to Figshare (2). Genderize uses a variety of information, such as social media records, to assign a probability that an individual with a particular forename is a man or a woman. For example, Genderize designates the forename “Chris” as male with 93% probability based on 8,631 verified records in the database. We considered gender determined if Genderize assigned a probability greater than chance (>50%) to preserve observations, given that the early stage of the COVID pandemic limits the set of associated publications. We designated the gender for more than 80% of the authors in our set. Of the authors designated, eight out of ten authors had an assigned gender probability of 90% or more (**Figure S2**). The gender designation for female first authors is equally accurate for both control and treatment group (**Figure S3**). As such, our main findings do not change when setting different gender designation thresholds.

Next, we compared the distribution of disciplines producing COVID research relative to the articles in the control sample (**Table S1**). Ranking the disciplines in terms of publication output, and testing a Spearman Rank correlation, we obtain a coefficient of greater 0.85. While this correlation would generally be considered strong (3) lending credence to our basic design, it does not consider the possibility that men and women may sort differently into these fields. However, our **Figure 1a** in the main text documents that it is primarily fields where women tend to be well represented that produce COVID research.

To execute country-level analyses, we use regular expressions to extract the full country name or country codes from affiliation data for the first author. We also ranked countries by productivity for COVID-articles and control articles, obtaining a Spearman rank correlation of 0.94, again supporting our approach of using non-COVID articles in the prior year as a control group (**Table S2**). This also mitigates concerns that countries with larger gender gaps in general produce more COVID research.

## Additional information on methods

### Measurement

To assess the effect of the COVID pandemic on the gender gap in publishing, we reported unadjusted differences in the percent of female first authorships versus male first authorships for COVID and non-COVID publications. This straightforward metric provides a direct and easy to understand measure of how the COVID pandemic impacts women's versus men's publication productivity.

$$\Delta GenderGap = \{FirstAuthor_{Female} - FirstAuthor_{Male} | COVID\} - \{FirstAuthor_{Female} - FirstAuthor_{Male} | Non - COVID\}$$

To conduct subgroup analysis for discipline and country, we calculated the change in the gender gap based on the percent of female and male first authorships for the specific discipline and country.

### Estimation

In addition to the unadjusted differences, we also provided adjusted differences in female versus male first authorship obtained from linear probability models (**Table S3**), adjusting for field of research and country. Logistic regression as an alternative estimation model has two disadvantages in our analysis. First, the large number of fixed effects when including countries and discipline dummies, for example, raises the possibility of incidental parameters bias and could prevent the convergence of some of our models. Second, logistic regressions can overestimate effect sizes as a result of the high leverage of marginal cases (i.e., identifying larger gender differences than reported

1  
2  
3 in the main text), whereas linear probability models average across observations and  
4 produce more conservative results (see also **Table S4**).  
5

6  
7 We provided adjusted estimates in the supplement as one might be concerned, for  
8 example, that men are more numerous in fields that produce COVID research. This  
9 would also lower women's observed COVID productivity but not due to pandemic  
10 related constraints as hypothesized, but rather due to underlying structural differences in  
11 subspecialties. Of note, the descriptive data paint a different picture, such that women  
12 tend to be at least equal if not overrepresented in the most productive COVID disciplines.  
13  
14

## 15 16 **References**

- 17  
18 1. C. N. G. detection, (<http://codingnews.info/post/genderdetection> (accessed  
19 11/15/17) (2015)).
- 20 2. Lerchenmueller. Marc, *Genderize\_unlimited\_API\_request*. (2017).
- 21 3. M. G. Pagano, Kimberlee, *Principle of Biostatistics*. (Brooks/Cole, ed. Secon  
22 Edition, 2000).  
23  
24  
25  
26  
27  
28  
29  
30  
31  
32  
33  
34  
35  
36  
37  
38  
39  
40  
41  
42  
43  
44  
45  
46  
47  
48  
49  
50  
51  
52  
53  
54  
55  
56  
57  
58  
59  
60

**Figure S1:** Sample construction for COVID articles and non-COVID (control) articles

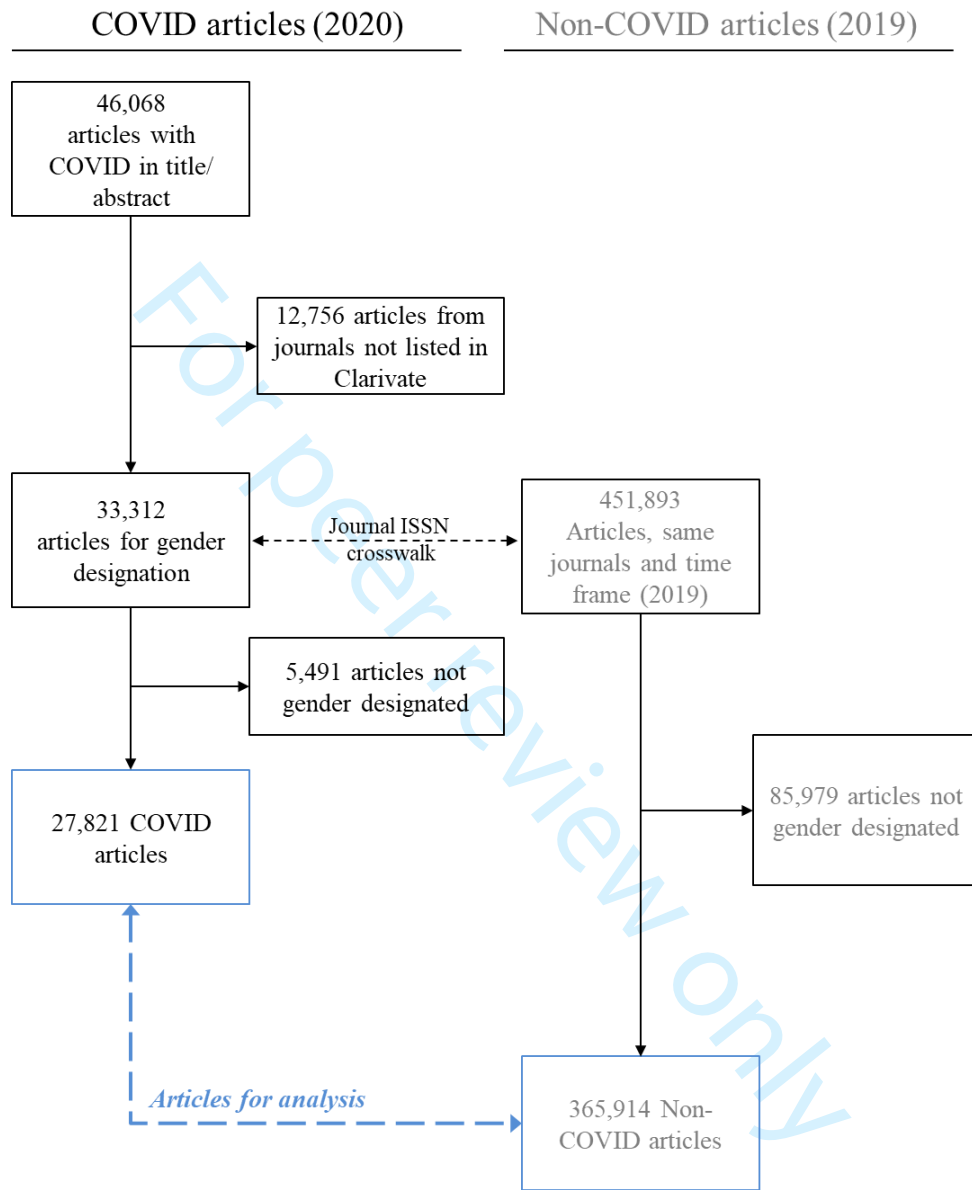

**Figure S2:** Gender designation accuracy for all articles in the sample (COVID articles and non-COVID articles) for female and male first authors

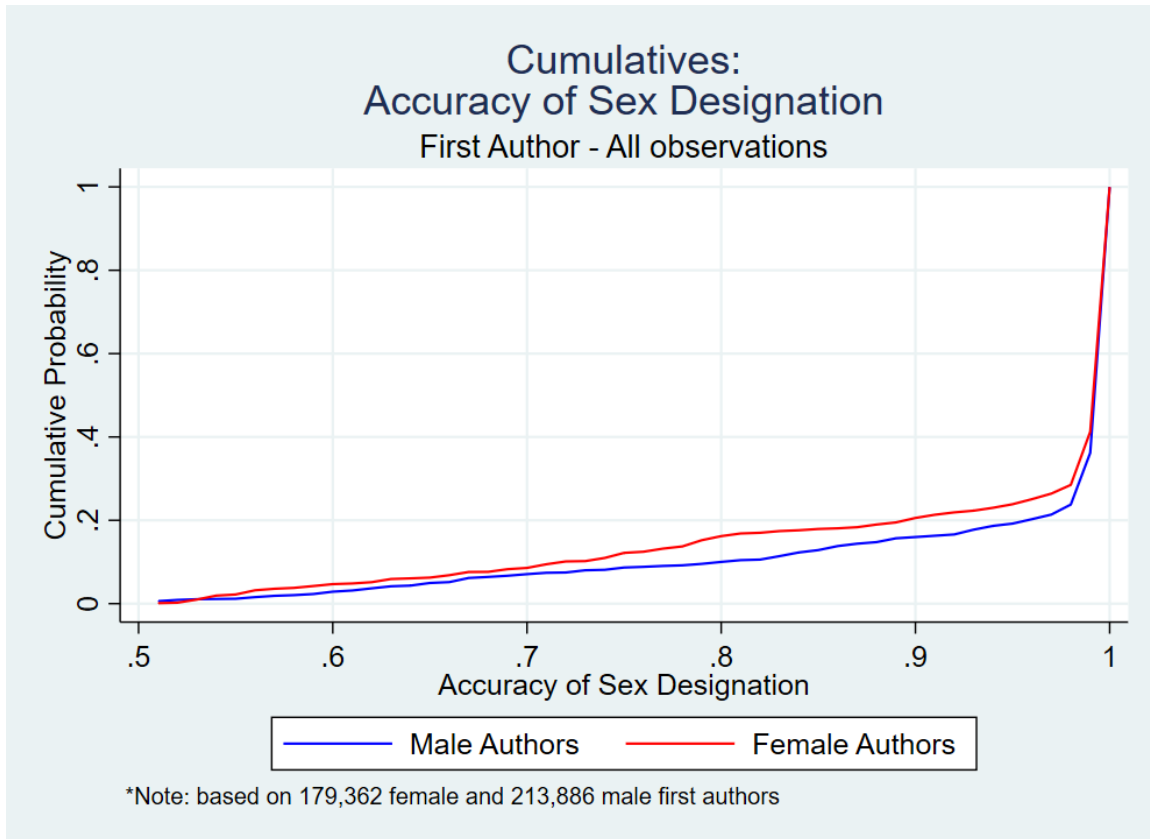

1  
2  
3  
4  
5  
6  
7  
8  
9  
10  
11  
12  
13  
14  
15  
16  
17  
18  
19  
20  
21  
22  
23  
24  
25  
26  
27  
28  
29  
30  
31  
32  
33  
34  
35  
36  
37  
38  
39  
40  
41  
42  
43  
44  
45  
46  
47  
48  
49  
50  
51  
52  
53  
54  
55  
56  
57  
58  
59  
60

**Figure S3:** Gender designation accuracy for first authors for COVID articles and non-COVID (control) articles separately

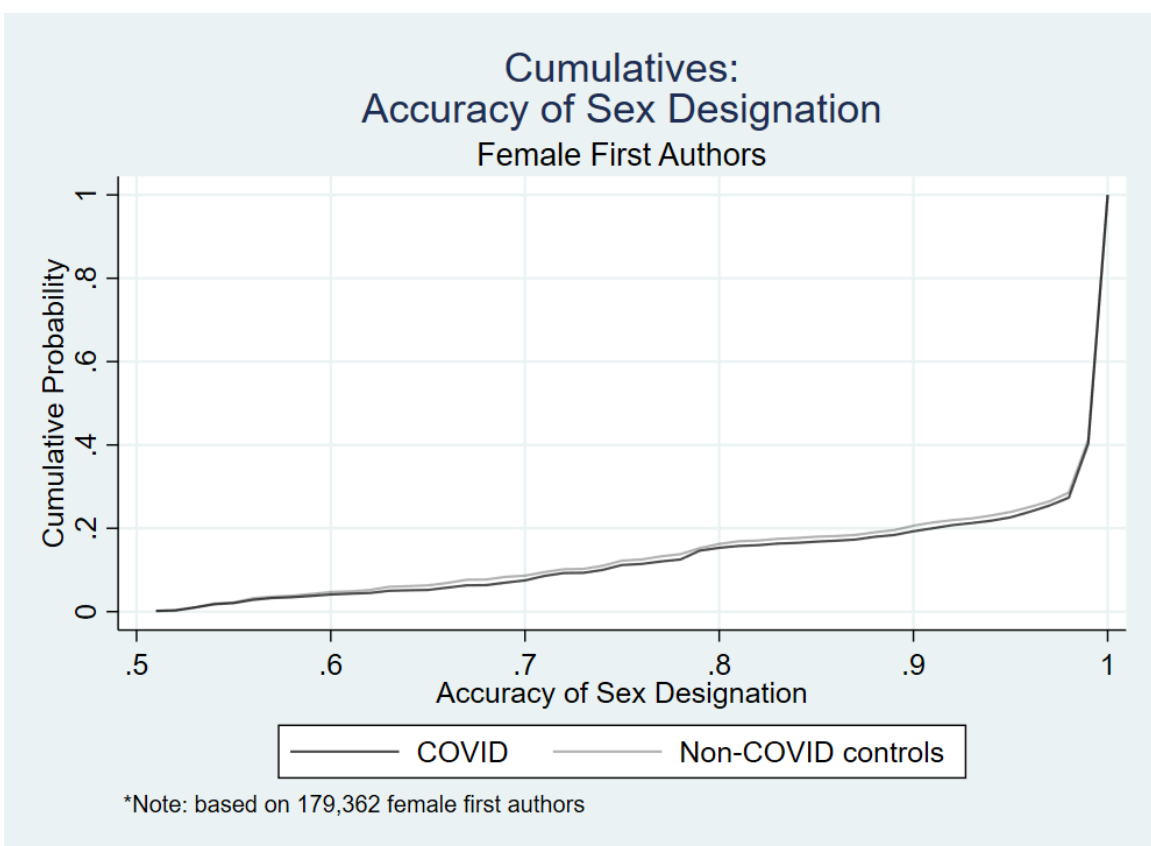

Peer Review Only

**Table S1:** Major disciplines for COVID articles and non-COVID (control) articles and concordance statistic

| Discipline                                   | Non-COVID |       |      | COVID |        |      | Total |       |      |
|----------------------------------------------|-----------|-------|------|-------|--------|------|-------|-------|------|
|                                              | Total     | %     | Rank | Total | %      | Rank | Total | %     | Rank |
| MEDICINE GENERAL & INTERNAL                  | 20237     | 5.55% | 4    | 2909  | 10.69% | 1    | 23146 | 5.91% | 3    |
| PUBLIC ENVIRONMENTAL & OCCUPATIONAL HEALTH   | 13059     | 3.58% | 8    | 2147  | 7.89%  | 2    | 15206 | 3.88% | 7    |
| SURGERY                                      | 20514     | 5.63% | 3    | 1726  | 6.34%  | 3    | 22240 | 5.68% | 4    |
| IMMUNOLOGY                                   | 9435      | 2.59% | 11   | 1303  | 4.79%  | 4    | 10738 | 2.74% | 10   |
| CARDIAC & CARDIOVASCULAR SYSTEMS             | 11951     | 3.28% | 9    | 1003  | 3.69%  | 5    | 12954 | 3.31% | 9    |
| PHARMACOLOGY & PHARMACY                      | 14833     | 4.07% | 6    | 887   | 3.26%  | 6    | 15720 | 4.01% | 6    |
| ONCOLOGY                                     | 18644     | 5.11% | 5    | 857   | 3.15%  | 7    | 19501 | 4.98% | 5    |
| PSYCHIATRY                                   | 7773      | 2.13% | 15   | 781   | 2.87%  | 8    | 8554  | 2.18% | 15   |
| INFECTIOUS DISEASES                          | 2189      | 0.60% | 40   | 756   | 2.78%  | 9    | 2945  | 0.75% | 36   |
| PEDIATRICS                                   | 8208      | 2.25% | 13   | 692   | 2.54%  | 10   | 8900  | 2.27% | 13   |
| ENVIRONMENTAL SCIENCES                       | 14000     | 3.84% | 7    | 654   | 2.40%  | 11   | 14654 | 3.74% | 8    |
| CLINICAL NEUROLOGY                           | 8093      | 2.22% | 14   | 646   | 2.37%  | 12   | 8739  | 2.23% | 14   |
| BIOCHEMISTRY & MOLECULAR BIOLOGY             | 22672     | 6.22% | 2    | 637   | 2.34%  | 13   | 23309 | 5.95% | 2    |
| VIROLOGY                                     | 1744      | 0.48% | 46   | 627   | 2.30%  | 14   | 2371  | 0.61% | 41   |
| RADIOLOGY NUCLEAR MEDICINE & MEDICAL IMAGING | 5875      | 1.61% | 17   | 620   | 2.28%  | 15   | 6495  | 1.66% | 17   |
| DERMATOLOGY                                  | 4267      | 1.17% | 25   | 591   | 2.17%  | 16   | 4858  | 1.24% | 23   |
| MEDICINE RESEARCH & EXPERIMENTAL             | 5344      | 1.47% | 20   | 583   | 2.14%  | 17   | 5927  | 1.51% | 20   |
| HEALTH CARE SCIENCES & SERVICES              | 3719      | 1.02% | 31   | 551   | 2.02%  | 18   | 4270  | 1.09% | 27   |
| GASTROENTEROLOGY & HEPATOLOGY                | 5628      | 1.54% | 18   | 549   | 2.02%  | 19   | 6177  | 1.58% | 18   |
| NEUROSCIENCES                                | 9627      | 2.64% | 10   | 520   | 1.91%  | 20   | 10147 | 2.59% | 11   |
| RESPIRATORY SYSTEM                           | 3149      | 0.86% | 34   | 509   | 1.87%  | 21   | 3658  | 0.93% | 34   |
| MULTIDISCIPLINARY SCIENCES                   | 27786     | 7.62% | 1    | 475   | 1.75%  | 22   | 28261 | 7.21% | 1    |
| HEMATOLOGY                                   | 3685      | 1.01% | 32   | 449   | 1.65%  | 23   | 4134  | 1.05% | 30   |
| UROLOGY & NEPHROLOGY                         | 5492      | 1.51% | 19   | 445   | 1.63%  | 24   | 5937  | 1.52% | 19   |
| ANESTHESIOLOGY                               | 1950      | 0.53% | 44   | 436   | 1.60%  | 25   | 2386  | 0.61% | 40   |
| ENDOCRINOLOGY & METABOLISM                   | 5240      | 1.44% | 21   | 434   | 1.59%  | 26   | 5674  | 1.45% | 21   |
| RHEUMATOLOGY                                 | 2592      | 0.71% | 36   | 327   | 1.20%  | 27   | 2919  | 0.74% | 37   |
| EMERGENCY MEDICINE                           | 1701      | 0.47% | 47   | 289   | 1.06%  | 28   | 1990  | 0.51% | 46   |
| OPHTHALMOLOGY                                | 4503      | 1.23% | 24   | 286   | 1.05%  | 29   | 4789  | 1.22% | 25   |
| OBSTETRICS & GYNECOLOGY                      | 3564      | 0.98% | 33   | 266   | 0.98%  | 30   | 3830  | 0.98% | 33   |
| NURSING                                      | 3747      | 1.03% | 30   | 255   | 0.94%  | 31   | 4002  | 1.02% | 32   |
| MICROBIOLOGY                                 | 4589      | 1.26% | 23   | 245   | 0.90%  | 32   | 4834  | 1.23% | 24   |
| GERIATRICS & GERONTOLOGY                     | 1569      | 0.43% | 51   | 240   | 0.88%  | 33   | 1809  | 0.46% | 49   |
| CELL BIOLOGY                                 | 6582      | 1.80% | 16   | 227   | 0.83%  | 34   | 6809  | 1.74% | 16   |
| DENTISTRY ORAL SURGERY & MEDICINE            | 3126      | 0.86% | 35   | 198   | 0.73%  | 35   | 3324  | 0.85% | 35   |
| CRITICAL CARE MEDICINE                       | 1486      | 0.41% | 54   | 188   | 0.69%  | 36   | 1674  | 0.43% | 52   |
| OTORHINOLARYNGOLOGY                          | 1650      | 0.45% | 50   | 185   | 0.68%  | 37   | 1835  | 0.47% | 48   |
| ORTHOPEDECS                                  | 2081      | 0.57% | 42   | 146   | 0.54%  | 38   | 2227  | 0.57% | 43   |
| MEDICAL LABORATORY TECHNOLOGY                | 1116      | 0.31% | 59   | 142   | 0.52%  | 39   | 1258  | 0.32% | 57   |
| SPORT SCIENCES                               | 2180      | 0.60% | 41   | 122   | 0.45%  | 40   | 2302  | 0.59% | 42   |
| ETHICS                                       | 478       | 0.13% | 73   | 118   | 0.43%  | 41   | 596   | 0.15% | 69   |
| BIOTECHNOLOGY & APPLIED MICROBIOLOGY         | 4070      | 1.12% | 28   | 115   | 0.42%  | 42   | 4185  | 1.07% | 29   |
| PATHOLOGY                                    | 1663      | 0.46% | 48   | 115   | 0.42%  | 43   | 1778  | 0.45% | 50   |
| ECONOMICS                                    | 178       | 0.05% | 88   | 112   | 0.41%  | 44   | 290   | 0.07% | 79   |
| PSYCHOLOGY MULTIDISCIPLINARY                 | 2423      | 0.66% | 37   | 101   | 0.37%  | 45   | 2524  | 0.64% | 38   |
| NUTRITION & DIETETICS                        | 4124      | 1.13% | 27   | 100   | 0.37%  | 46   | 4224  | 1.08% | 28   |
| GENETICS & HEREDITY                          | 4248      | 1.16% | 26   | 94    | 0.35%  | 47   | 4342  | 1.11% | 26   |
| PSYCHOLOGY CLINICAL                          | 1770      | 0.49% | 45   | 94    | 0.35%  | 48   | 1864  | 0.48% | 47   |
| BIOLOGY                                      | 1654      | 0.45% | 49   | 89    | 0.33%  | 49   | 1743  | 0.44% | 51   |
| VETERINARY SCIENCES                          | 2357      | 0.65% | 38   | 85    | 0.31%  | 50   | 2442  | 0.62% | 39   |

**Spearman Rank Correlation - all disciplines**

|                  |        |
|------------------|--------|
| coefficient (rs) | 0.851  |
| N                | 136    |
| T statistic      | 18.765 |
| DF               | 134    |
| p-value          | 0.000  |

**Spearman Rank Correlation - top 50 disciplines**

|                  |       |
|------------------|-------|
| coefficient (rs) | 0.690 |
| N                | 50    |
| T statistic      | 6.605 |
| DF               | 48    |
| p-value          | 0.000 |



**Table S2:** Major countries for COVID articles and non-COVID (control) articles and concordance statistics

| Country (First Author) | Non-COVID |        |      | COVID |        |      | Total  |        |      |
|------------------------|-----------|--------|------|-------|--------|------|--------|--------|------|
|                        | Total     | %      | Rank | Total | %      | Rank | Total  | %      | Rank |
| United States          | 101455    | 24.50% | 1    | 8461  | 25.63% | 1    | 109916 | 24.58% | 1    |
| Italy                  | 17731     | 4.28%  | 5    | 3414  | 10.34% | 2    | 21145  | 4.73%  | 4    |
| China                  | 50503     | 12.20% | 2    | 2919  | 8.84%  | 3    | 53422  | 11.95% | 2    |
| United Kingdom         | 23817     | 5.75%  | 3    | 2687  | 8.14%  | 4    | 26504  | 5.93%  | 3    |
| India                  | 11992     | 2.90%  | 9    | 1575  | 4.77%  | 5    | 13567  | 3.03%  | 9    |
| Spain                  | 11762     | 2.84%  | 10   | 1070  | 3.24%  | 6    | 12832  | 2.87%  | 10   |
| Canada                 | 13661     | 3.30%  | 8    | 979   | 2.97%  | 7    | 14640  | 3.27%  | 8    |
| France                 | 10382     | 2.51%  | 13   | 969   | 2.94%  | 8    | 11351  | 2.54%  | 13   |
| Brasil                 | 10616     | 2.56%  | 12   | 877   | 2.66%  | 9    | 11493  | 2.57%  | 12   |
| Germany                | 18279     | 4.41%  | 4    | 741   | 2.24%  | 10   | 19020  | 4.25%  | 5    |
| Australia              | 13921     | 3.36%  | 7    | 732   | 2.22%  | 11   | 14653  | 3.28%  | 7    |
| Iran                   | 6232      | 1.50%  | 15   | 714   | 2.16%  | 12   | 6946   | 1.55%  | 15   |
| Turkey                 | 5751      | 1.39%  | 16   | 548   | 1.66%  | 13   | 6299   | 1.41%  | 16   |
| Singapore              | 2005      | 0.48%  | 31   | 466   | 1.41%  | 14   | 2471   | 0.55%  | 27   |
| Japan                  | 16637     | 4.02%  | 6    | 378   | 1.15%  | 15   | 17015  | 3.81%  | 6    |
| Switzerland            | 5004      | 1.21%  | 18   | 359   | 1.09%  | 16   | 5363   | 1.20%  | 18   |
| South Korea            | 11499     | 2.78%  | 11   | 333   | 1.01%  | 17   | 11832  | 2.65%  | 11   |
| Hong Kong              | 1600      | 0.39%  | 36   | 291   | 0.88%  | 18   | 1891   | 0.42%  | 34   |
| Netherlands            | 7692      | 1.86%  | 14   | 285   | 0.86%  | 19   | 7977   | 1.78%  | 14   |
| Taiwan                 | 5473      | 1.32%  | 17   | 282   | 0.85%  | 20   | 5755   | 1.29%  | 17   |
| Israel                 | 3320      | 0.80%  | 22   | 275   | 0.83%  | 21   | 3595   | 0.80%  | 22   |
| Pakistan               | 1638      | 0.40%  | 35   | 263   | 0.80%  | 22   | 1901   | 0.43%  | 33   |
| Greece                 | 2213      | 0.53%  | 27   | 254   | 0.77%  | 23   | 2467   | 0.55%  | 28   |
| Belgium                | 3298      | 0.80%  | 23   | 250   | 0.76%  | 24   | 3548   | 0.79%  | 23   |
| Saudi Arabia           | 2040      | 0.49%  | 30   | 245   | 0.74%  | 25   | 2285   | 0.51%  | 30   |
| Mexico                 | 2507      | 0.61%  | 24   | 213   | 0.65%  | 26   | 2720   | 0.61%  | 24   |
| Poland                 | 4543      | 1.10%  | 20   | 169   | 0.51%  | 27   | 4712   | 1.05%  | 20   |
| Ireland                | 1700      | 0.41%  | 34   | 167   | 0.51%  | 28   | 1867   | 0.42%  | 35   |
| Egypt                  | 2147      | 0.52%  | 29   | 143   | 0.43%  | 29   | 2290   | 0.51%  | 29   |
| Sweden                 | 4579      | 1.11%  | 19   | 140   | 0.42%  | 30   | 4719   | 1.06%  | 19   |
| Portugal               | 2485      | 0.60%  | 25   | 140   | 0.42%  | 31   | 2625   | 0.59%  | 25   |
| Malaysia               | 1334      | 0.32%  | 40   | 126   | 0.38%  | 32   | 1460   | 0.33%  | 39   |
| Austria                | 2404      | 0.58%  | 26   | 113   | 0.34%  | 33   | 2517   | 0.56%  | 26   |
| South Africa           | 1441      | 0.35%  | 37   | 107   | 0.32%  | 34   | 1548   | 0.35%  | 37   |
| Bangladesh             | 307       | 0.07%  | 65   | 97    | 0.29%  | 35   | 404    | 0.09%  | 63   |
| Peru                   | 383       | 0.09%  | 62   | 96    | 0.29%  | 36   | 479    | 0.11%  | 55   |
| Denmark                | 3558      | 0.86%  | 21   | 90    | 0.27%  | 37   | 3648   | 0.82%  | 21   |
| Colombia               | 740       | 0.18%  | 45   | 88    | 0.27%  | 38   | 828    | 0.19%  | 45   |
| New Zealand            | 1783      | 0.43%  | 33   | 80    | 0.24%  | 39   | 1863   | 0.42%  | 36   |
| Georgia                | 1080      | 0.26%  | 43   | 76    | 0.23%  | 40   | 1156   | 0.26%  | 43   |
| Argentina              | 1250      | 0.30%  | 41   | 74    | 0.22%  | 41   | 1324   | 0.30%  | 41   |
| Chile                  | 1083      | 0.26%  | 42   | 74    | 0.22%  | 42   | 1157   | 0.26%  | 42   |
| Indonesia              | 635       | 0.15%  | 48   | 74    | 0.22%  | 43   | 709    | 0.16%  | 48   |
| United Arab Emirates   | 505       | 0.12%  | 53   | 72    | 0.22%  | 44   | 577    | 0.13%  | 52   |
| Lebanon                | 619       | 0.15%  | 49   | 71    | 0.22%  | 45   | 690    | 0.15%  | 49   |
| Nigeria                | 577       | 0.14%  | 50   | 70    | 0.21%  | 46   | 647    | 0.14%  | 50   |
| Norway                 | 2195      | 0.53%  | 28   | 67    | 0.20%  | 47   | 2262   | 0.51%  | 31   |
| Morocco                | 267       | 0.06%  | 67   | 64    | 0.19%  | 48   | 331    | 0.07%  | 66   |
| Jordan                 | 386       | 0.09%  | 61   | 59    | 0.18%  | 49   | 445    | 0.10%  | 59   |
| Thailand               | 709       | 0.17%  | 47   | 58    | 0.18%  | 50   | 767    | 0.17%  | 46   |

**Spearman Rank Correlation - all countries**

|                  |       |
|------------------|-------|
| coefficient (rs) | 0.94  |
| N                | 165   |
| T statistic      | 34.61 |
| DF               | 163   |
| p-value          | 0.000 |

**Spearman Rank Correlation - top 50 countries**

|                  |       |
|------------------|-------|
| coefficient (rs) | 0.86  |
| N                | 50    |
| T statistic      | 11.50 |
| DF               | 48    |
| p-value          | 0.000 |

**Table S3:** Hierarchical linear probability model for the likelihood of female first authorship for COVID articles versus non-COVID (control) articles

| <i>Dependent variable: First Author Female</i> | (1)                        | (2)                        | (3)                        | (4)                        | (5)                        |
|------------------------------------------------|----------------------------|----------------------------|----------------------------|----------------------------|----------------------------|
| <b>COVID</b>                                   | <b>-0.089***</b><br>(0.00) | <b>-0.089***</b><br>(0.00) | <b>-0.090***</b><br>(0.00) | <b>-0.091***</b><br>(0.00) | <b>-0.096***</b><br>(0.00) |
| number of authors                              |                            | 0.002***<br>(0.00)         | 0.002***<br>(0.00)         | 0.003***<br>(0.00)         | 0.003***<br>(0.00)         |
| publication month fixed effects (8)            |                            |                            | Included                   | Included                   | Included                   |
| discipline fixed effects (136)                 |                            |                            |                            | Included                   | Included                   |
| country fixed effects (165)                    |                            |                            |                            |                            | Included                   |
| constant                                       | 0.462***<br>(0.00)         | 0.449***<br>(0.00)         | 0.444***<br>(0.00)         | 0.305***<br>(0.02)         | 0.146<br>(0.13)            |
| R-squared                                      | 0.002                      | 0.003                      | 0.003                      | 0.036                      | 0.052                      |
| Adjusted R-squared                             | 0.002                      | 0.003                      | 0.003                      | 0.036                      | 0.051                      |
| Observations                                   | 393,248                    | 393,248                    | 393,207                    | 393,207                    | 368,599                    |

Note: standard errors in brackets, \*  $p < 0.05$ , \*\*  $p < 0.01$ , \*\*\*  $p < 0.001$

**Table S4:** Hierarchical logit regression for the likelihood of female first authorship for COVID articles versus non-COVID (control) articles

| <i>Dependent variable: First Author Female</i> | (1)                       | (2)                       | (3)                       | (4)                       | (5)                       |
|------------------------------------------------|---------------------------|---------------------------|---------------------------|---------------------------|---------------------------|
| <b>COVID</b>                                   | <b>0.693***</b><br>(0.01) | <b>0.693***</b><br>(0.01) | <b>0.689***</b><br>(0.01) | <b>0.677***</b><br>(0.01) | <b>0.662***</b><br>(0.01) |
| number of authors                              |                           | 1.009***<br>(0.00)        | 1.009***<br>(0.00)        | 1.011***<br>(0.00)        | 1.011***<br>(0.00)        |
| publication month fixed effects (8)            |                           |                           | Included                  | Included                  | Included                  |
| discipline fixed effects (136)                 |                           |                           |                           | Included                  | Included                  |
| country fixed effects (165)                    |                           |                           |                           |                           | Included                  |
| constant                                       | 0.860***<br>(0.00)        | 0.813***<br>(0.00)        | 0.798***<br>(0.01)        | 0.441***<br>(0.04)        | 0.220**<br>(0.12)         |
| observations                                   | 393,248                   | 393,248                   | 393,207                   | 393,202                   | 368,543                   |

Note: Coefficients reported as odds ratios, standard errors in brackets, \*  $p < 0.05$ , \*\*  $p < 0.01$ , \*\*\*  $p < 0.001$

# BMJ Open

## Longitudinal Analyses of Gender Differences in First Authorship Publications Related to COVID-19

|                                 |                                                                                                                                                                                                           |
|---------------------------------|-----------------------------------------------------------------------------------------------------------------------------------------------------------------------------------------------------------|
| Journal:                        | <i>BMJ Open</i>                                                                                                                                                                                           |
| Manuscript ID                   | bmjopen-2020-045176.R1                                                                                                                                                                                    |
| Article Type:                   | Original research                                                                                                                                                                                         |
| Date Submitted by the Author:   | 01-Mar-2021                                                                                                                                                                                               |
| Complete List of Authors:       | Lerchenmüller, Carolin; University Hospital Heidelberg, Schmallenbach, Leo; University of Mannheim Jena, Anupam; Harvard University, Health Care Policy<br>Lerchenmueller, Marc ; University of Mannheim, |
| <b>Primary Subject Heading</b>: | Health policy                                                                                                                                                                                             |
| Secondary Subject Heading:      | Health services research, Medical publishing and peer review                                                                                                                                              |
| Keywords:                       | GENERAL MEDICINE (see Internal Medicine), COVID-19, Health policy < HEALTH SERVICES ADMINISTRATION & MANAGEMENT                                                                                           |
|                                 |                                                                                                                                                                                                           |

SCHOLARONE™  
Manuscripts



I, the Submitting Author has the right to grant and does grant on behalf of all authors of the Work (as defined in the below author licence), an exclusive licence and/or a non-exclusive licence for contributions from authors who are: i) UK Crown employees; ii) where BMJ has agreed a CC-BY licence shall apply, and/or iii) in accordance with the terms applicable for US Federal Government officers or employees acting as part of their official duties; on a worldwide, perpetual, irrevocable, royalty-free basis to BMJ Publishing Group Ltd ("BMJ") its licensees and where the relevant Journal is co-owned by BMJ to the co-owners of the Journal, to publish the Work in this journal and any other BMJ products and to exploit all rights, as set out in our [licence](#).

The Submitting Author accepts and understands that any supply made under these terms is made by BMJ to the Submitting Author unless you are acting as an employee on behalf of your employer or a postgraduate student of an affiliated institution which is paying any applicable article publishing charge ("APC") for Open Access articles. Where the Submitting Author wishes to make the Work available on an Open Access basis (and intends to pay the relevant APC), the terms of reuse of such Open Access shall be governed by a Creative Commons licence – details of these licences and which [Creative Commons](#) licence will apply to this Work are set out in our licence referred to above.

Other than as permitted in any relevant BMJ Author's Self Archiving Policies, I confirm this Work has not been accepted for publication elsewhere, is not being considered for publication elsewhere and does not duplicate material already published. I confirm all authors consent to publication of this Work and authorise the granting of this licence.

1  
2  
3 **Longitudinal Analyses of Gender Differences in First Authorship Publications**  
4 **Related to COVID-19**  
5  
6  
7

8 Carolin Lerchenmüller, MD,<sup>1,2</sup> Leo Schmallenbach, MSc,<sup>3</sup>  
9 Anupam B. Jena, MD, PhD<sup>4,5,6\*</sup>, Marc J. Lerchenmueller, MPH, PhD<sup>3\*</sup>  
10  
11

12 <sup>1</sup>Department of Cardiology, Angiology, Pulmonology, University Hospital  
13 Heidelberg, Germany

14 <sup>2</sup>German Center for Heart and Cardiovascular Research (DZHK), Partner Site  
15 Heidelberg/Mannheim, Germany

16 <sup>3</sup>Area Management, University of Mannheim, Mannheim, Germany

17 <sup>4</sup>Department of Health Care Policy, Harvard Medical School Boston, MA

18 <sup>5</sup>Department of Medicine, Massachusetts General Hospital, Boston, MA

19 <sup>6</sup>National Bureau of Economic Research, Cambridge, MA  
20  
21  
22  
23

24 \*These authors contributed equally  
25

26 Word count: 3837

27 Keywords: COVID-19, Health policy, Gender equity  
28  
29  
30

31 **Corresponding author:**  
32

33 Carolin Lerchenmueller, MD

34 Department of Cardiology, Angiology, Pulmonology

35 University Hospital Heidelberg

36 INF 410

37 69120 Heidelberg, Germany

38 Email: carolin.lerchenmueller@med.uni-heidelberg.de  
39  
40  
41  
42  
43  
44  
45  
46  
47  
48  
49  
50  
51  
52  
53  
54  
55  
56  
57  
58  
59  
60

## Abstract

**Objective:** Concerns have been raised that the COVID pandemic has shifted research productivity to the disadvantage of women in academia, particularly in early career stages. In this study, we aimed to assess the pandemic's effect on women's COVID-related publishing over the first year of the pandemic.

**Methods and Results:** We compared the gender distribution of first authorships for 42,898 publications on COVID-19 from February 1<sup>st</sup>, 2020 to January 31<sup>st</sup>, 2021 to 483,232 publications appearing in the same journals during the same period the year prior. We found that the gender gap – the percentage of articles on which men versus women were first authors – widened by 14 percentage points during the COVID pandemic, despite many pertinent research fields showing near equal proportions of men and women first authors publishing in the same fields before the pandemic. Longitudinal analyses revealed that the significant initial expansions of the gender gap began to trend backwards to expected values over time in many fields. As women may have been differentially affected depending on their geography, we also assessed the gender distribution of first authorships grouped by countries and continents. While we observed a significant reduction of the shares of women first authors in almost all countries, longitudinal analyses confirmed a resolving trend over time.

**Conclusion:** The reduction in women's COVID-related research output appears particularly concerning as many disciplines informing the response to the pandemic had near equal gender shares of first authorship in the year prior to the pandemic. The acute productivity drain with the onset of the pandemic magnifies deep rooted obstacles on the way to gender equity in scientific contribution.

### Strengths and limitations of this study

- The COVID pandemic is an exogenous source of variation that allows the examination of differential effects of the pandemic on women's and men's publishing activity
- We used a retrospective cohort design, comparing author gender for COVID articles to articles in similar fields published during the year prior to the pandemic
- Data on affiliations, publishing journals and dates enable analyses of gender differences in publication rates by geography, scientific discipline, and over time
- This large-scale archival study did not allow disentangling the mechanisms that underpin gender differences in publishing rates associated with the pandemic
- The methodology relied on a probabilistic algorithm to assign gender to thousands of authors, bearing a residual risk of gender misclassification



## Introduction

Women are integral to productive and innovative science communities.<sup>1 2</sup> Nonetheless, women remain underrepresented in prestigious author positions on publications in the life sciences and medicine,<sup>3</sup> are less likely to be promoted to higher academic ranks, and are paid less, despite the continuously growing number of women academics.<sup>4</sup> Projections indicate that this gap will persist if targeted interventions are not implemented.<sup>5</sup>

It is in this setting that concerns have been raised that research and expert reporting on the COVID (Coronavirus Disease 2019, COVID-19) pandemic has disproportionately involved men as scientific authors. For example, women submitted fewer manuscripts overall, were less available for peer review,<sup>6-8</sup> and attended fewer funding panel meetings.<sup>7</sup> Also, women first authorship was significantly reduced on preprints and publications about COVID in the US<sup>9 10</sup> and globally.<sup>11</sup>

It has been suggested that this might, at least in part, be due to an exacerbation of pre-existing work-family conflicts, especially for early-career mothers in academia.<sup>12</sup> With lockdown measures to prevent uncontrolled spread of the coronavirus came not only remote working, but also closures of childcare services like daycares and schools transferring teaching responsibilities often to mothers, without the possibility to involve family members in childcare that belong to the aging population who are particularly vulnerable to severe illness from the coronavirus.<sup>12-16</sup> Evidence from Germany showed, for example, that women not only took over the physical load of increased childcare and household responsibilities, but also the mental load associated with taking care of the family during a pandemic.<sup>17</sup> Even prior to the pandemic, research has shown that childrearing and household work were tasks largely taken care of by women, thereby impacting women's academic careers more than men's. For example,

1  
2  
3 parental leaves taken by men often result in increased productivity, while no such  
4  
5 phenomenon can be observed for women.<sup>18</sup>  
6  
7

8 The proliferation of COVID related publications provide a unique window into  
9  
10 these gendered dynamics for two reasons. First, COVID publications have been  
11  
12 produced rapidly under unusual conditions that likely disfavor women scientists  
13  
14 relative to usual conditions that can serve as a control. Second, COVID publications  
15  
16 are mainly, though not exclusively, produced in the life sciences and medicine where  
17  
18 long-standing authorship norms reserve the first author position to early career  
19  
20 investigators leading the project, which allows estimating the repercussions for this  
21  
22 group in particular. Therefore, we assessed the pandemic's effect on women's COVID-  
23  
24 related scientific publishing over the first year of the pandemic by analyses of first  
25  
26 authorships in a longitudinal approach. We further performed analyses to quantify the  
27  
28 effect per scientific specialty and country affiliation, as women may have been  
29  
30 differentially affected across specialties and geographic areas.  
31  
32  
33  
34  
35  
36  
37  
38  
39  
40  
41  
42  
43  
44  
45  
46  
47  
48  
49  
50  
51  
52  
53  
54  
55  
56  
57  
58  
59  
60

## Methods

### Study Design and Data

We use a retrospective cohort design, comparing the gender composition on the author byline of 42,898 PubMed indexed life science articles that included the term “COVID” in the title and/ or abstract and that were published between February 2020 and January 2021 to a set of 483,232 control articles published in the same journals a year earlier (see Supplement Materials for details on data and methods). The onset of the COVID-19 pandemic in early 2020 (and ensuing countermeasures like lockdowns, remote work etc.) serve as source of exogenous variation that affects authors of COVID articles but not authors who published research in the same journals prior to the COVID outbreak, i.e., our control group. To assess possible effect stratification across research areas, we allocated 3,426 represented journals to scientific disciplines based on the disciplines provided in the Clarivate Journal Citation Report using unique International Standard Serial Numbers (ISSNs) as a crosswalk. We restricted our analysis to disciplines with at least 50 publications per reported time period to provide more precise estimates. We obtained detailed affiliation records to determine the geographic locale of first authors for country-specific analyses. We restricted this analysis to countries with at least 50 publications, and continents with at least 10 publications per reported time point, to increase precision of estimates (see Figure S1 for details on the sample construction).

We further made use of a long-standing authorship norm in the life sciences, according to which the first author is usually the junior author who executed the research, while the last author is generally the senior author who funded and may have conceived of the research. To designate the probable gender of thousands of these authors in our dataset, we use the genderize.io database that draws on a number of

1  
2  
3 official sources, like Social Security Administration records and social media profiles,  
4  
5 to assign a probability that a given forename is more likely held by men or women. For  
6  
7 our analysis, we only included cases where the algorithm assigned a 90% or greater  
8  
9 probability to the individual being of a specific gender (see also Figures S2–S4).  
10  
11 Overall, our applied inclusion criteria did not introduce tangible selection bias in terms  
12  
13 of fields or countries represented (see Tables S1–S2).  
14  
15  
16  
17  
18

### 19 **Outcome measures**

20  
21 We calculated the gender gap in academic authorships as the absolute  
22  
23 percentage point difference between men and women authors. For example, if men and  
24  
25 women accounted for 55% and 45% of first author positions, respectively, the absolute  
26  
27 gender difference would be 10 percentage points. We also offered parametric analyses  
28  
29 in the supplement, analyzing the effect of authoring during the pandemic versus not (a  
30  
31 binary independent variable) on the likelihood that the first author was a woman versus  
32  
33 a man (our outcome) (Table S3–S5).  
34  
35  
36  
37  
38  
39

### 40 **Sensitivity analyses**

41  
42 We conducted additional sensitivity analyses (Table S6–S7), including varying  
43  
44 the confidence with which gender could be inferred, excluding articles with group  
45  
46 authorships, rerunning our analyses for the full set of articles (i.e., without applying  
47  
48 sampling restrictions), and comparing sampled to non-sampled observations.  
49  
50  
51  
52  
53

### 54 **Patient and Public Involvement**

55  
56 No patients were involved in setting the research question or the outcome  
57  
58 measures, nor were they involved in developing plans for design or implementation of  
59  
60

1  
2  
3 the study. No patients were asked to advise on the interpretation or write up of the  
4  
5 results. There are no plans to disseminate the results of the research to study participants  
6  
7  
8 or the relevant patient community.  
9  
10  
11  
12  
13  
14  
15  
16  
17  
18  
19  
20  
21  
22  
23  
24  
25  
26  
27  
28  
29  
30  
31  
32  
33  
34  
35  
36  
37  
38  
39  
40  
41  
42  
43  
44  
45  
46  
47  
48  
49  
50  
51  
52  
53  
54  
55  
56  
57  
58  
59  
60

For peer review only

## Results

### **One-year gender differences in first and last authorships related to COVID publications**

On average, men accounted for 54.9% and women for 45.1% of first authorships in 483,232 articles, published before the pandemic (between February 2019 and January 2020), for an absolute gender gap of 9.8 percentage points. In contrast, men and women accounted for 62.3% and 37.7% of first authorships on COVID-related publications, for an absolute gender gap of 24.6 percentage points. The gender gap therefore widened by approximately 14.8 percentage points in disciplines related to the COVID pandemic (Figure 1). Smaller changes were observed in last authorships. For example, while the gender gap in last authorships before the pandemic was expectedly much larger (approximately 36 percentage points), the effect of the pandemic on last author publishing by women was less pronounced (albeit statistically significant given the large sample size). On average, women accounted for 31.9% of last authorships in articles published before the pandemic, compared with 30.5% of last authorships for COVID-related publications, representing a widening of the last author gender gap by approximately 2.8 percentage points (Figure 1). In line with previous data, our results therefore indicate that junior women investigators were disproportionately affected by the pandemic.<sup>9-11 13 15</sup> As women may have been differently affected depending on their field of study or depending on geography, we further sought to investigate gender differences particularly in first authorships according to field of study and country.

### **Longitudinal analysis of gender differences in first authorships on COVID publications, by scientific discipline**

1  
2  
3 As the first author gender gap in publications generally varies across fields,<sup>19</sup>  
4 we calculated the first author gender gap by discipline. We allocated the journals that  
5 published on COVID to scientific fields based on the disciplines represented in the  
6 Clarivate journal citation report.<sup>20</sup> As depicted in the first column of the heatmap in  
7 Figure 2, disciplines producing most COVID-relevant publications had shares of first  
8 authorship pre-COVID by women of 45% (i.e., an average gender gap of approximately  
9 10 percentage points across all disciplines). During the pandemic, however,  
10 publications related to COVID had an average one-year gender gap of approximately  
11 24 percentage points (i.e. the share of first authorships from women for publications  
12 related to COVID was 38%), a deviation of 14 percentage points (Figure 2). This effect  
13 was most prominent in the first months of COVID publishing, from February to May  
14 of 2020, when the gender gap rose to 36 percentage points (corresponding to a share of  
15 women first authorships of 32%). In the following months from June to September  
16 2020, the share of female first authors slowly increased again to an average of 37%,  
17 and to 41% from October 2020 to January 2021, reducing the gender gap to 26 and 18  
18 percentage points, respectively. However, this still represented a significant deviation  
19 from the pre-pandemic gender gap of 8 percentage points.  
20  
21  
22  
23  
24  
25  
26  
27  
28  
29  
30  
31  
32  
33  
34  
35  
36  
37  
38  
39  
40  
41

42 Interestingly, many of the disciplines that produced most COVID publications  
43 had equal or near-equal gender shares in the year before the pandemic. For example, in  
44 the fields of Virology, Immunology, Infectious Diseases, and General/Internal  
45 Medicine, the shares of women first authors prior to COVID were 50%, 52%, 48%, and  
46 44%, respectively. The share of women first authors in other relevant fields like Public,  
47 Environmental and Occupational Health was even higher (59%). In many relevant  
48 fields, the gender rift in first authorships for COVID-related publications widened  
49 significantly above the pre-COVID average. For example, while women were more  
50  
51  
52  
53  
54  
55  
56  
57  
58  
59  
60

1  
2  
3 likely to be first authors on publications within Public, Environmental and Occupational  
4 Health (difference of 18 percentage points) before the pandemic, the gap changed by  
5  
6 30 percentage points so that women were now less likely to publish research within this  
7  
8 field as first authors of COVID-related publications (gender gap of 12 percentage  
9  
10 points). In Biochemistry and Molecular Biology, the gender gap in first authorships  
11  
12 increased by 34 percentage points, from 2 percentage points pre-COVID to 36  
13  
14 percentage points for COVID publications. In Virology, the gender gap increased by  
15  
16 26 percentage points, from equal shares (no gap) to 26 percentage points for COVID-  
17  
18 publications. Other COVID-relevant fields were much less prone to changes in the first  
19  
20 author gender gap, for example Surgery, and Cardiac & Cardiovascular Systems, in  
21  
22 which the gender gap prior to COVID was 44 percentage points compared with 46  
23  
24 percentage points for COVID-related studies, respectively (meaning women's first  
25  
26 authorship shares were as low as 28 and 27%, respectively) (Figure 2).  
27  
28  
29  
30  
31  
32  
33  
34  
35  
36  
37  
38  
39

### 40 **Longitudinal analyses of gender differences in first authorships on COVID** 41 **publications, by affiliated geographic area** 42 43 44 45 46 47 48 49 50 51 52 53 54 55 56 57 58 59 60

Since the pandemic has affected countries differently, we further performed analyses based on the country affiliation of the first author. Women's research productivity went down in almost all countries (Figure 3a). For example, in the United States, which accounted for ~26% of all COVID publications between February 2020 and January 2021, women's first authorship share decreased from a share of 44% to a share of 41% (corresponding to a widening of the gender gap by 6 percentage points). In European countries that were hit earlier by the pandemic than the US, women's representation in authorships was also more affected. In Italy, for example, women's share of first authorships decreased from 49% before the pandemic to 35% for COVID-



1  
2  
3 related publications, an increase in the gender gap of 28 percentage points because of  
4 the pandemic, with the overall number of publications from Italy accounting for 10%  
5 of total publications on COVID. The increase in the first authorship gender gap was  
6 also substantive in Brazil (30 percentage points), and Mexico (35 percentage points),  
7 Australia (14 percentage points), and India (22 percentage points). Only very few  
8 countries showed no change in the first authorship gender gap, including China (no  
9 change), South Korea (decreased by 3 percentage points), or Taiwan (decreased by 2  
10 percentage points).  
11  
12  
13  
14  
15  
16  
17  
18  
19  
20

21 We further performed a granular time-resolved (per two-months) analysis of  
22 women's first authorship shares grouped by continents. Our data showed that the largest  
23 reduction in women's first authorship shares happened early in last spring (April and  
24 May 2020). In Europe, for example, the gender gap increased by 18 percentage points,  
25 in North America by 8 percentage points, in Latin America by 28 percentage points, in  
26 Australia and Oceania by 15 percentage points, in Africa by 18 percentage points, and  
27 in Asia by 7 percentage points (Figure 3b). Similar to our analysis of the difference in  
28 first authorship shares over time by field, we found that the gap began to close again  
29 over time and seemed to have reached baseline levels in North America and Oceania.  
30 In all the other continents, the gender gap has yet to reach the levels expected from the  
31 year prior to the pandemic, with Africa and Latin America being farthest from the  
32 baseline (12 percentage points, respectively) (Figure 3b), while COVID related  
33 research output has been relatively stable from April 2020 to January 2021 within each  
34 continent.  
35  
36  
37  
38  
39  
40  
41  
42  
43  
44  
45  
46  
47  
48  
49  
50  
51  
52  
53  
54  
55  
56  
57  
58  
59  
60

## Discussion

Our results provide evidence for the COVID pandemic's effect on women's publishing productivity across disciplines, worldwide, and over time. In line with our hypothesis, we found that the relative increase in the gender gap was more pronounced for women in the first author position. In light of previous research and observations<sup>13 15 18 21</sup>, we suspected that the overcontribution of women to household and child rearing responsibilities - that leaves less opportunity to participate in writing, submitting and publishing research related to COVID - led to reduced productivity of early career women investigators. However, aside from time constraints that disproportionately changed for women in an earlier stage of their career, other reasons are possible for the significant difference of women's productivity with regards to COVID. For example, since COVID emerged as a high-profile, and very publishable subject, it is possible that it was easier for men, that are still more likely to be in leadership and well-funded positions in academia to pick up the topic quickly. Also, women were less likely to function as expert reviewers on articles related to COVID,<sup>6-8</sup> known to potentially exacerbate a pre-existing gender bias in the peer-review and publishing process.<sup>22-24</sup> These might contribute to a vicious cycle that hindered access to COVID publishing especially for women in the early stages of their career.<sup>11</sup> The exact determination of underlying mechanisms, however, warrant future research that might also benefit from longer time series data.

Interestingly, we found that decreased publishing activity was specifically significant in fields that had a relatively equal share between women and men as first authors prior to the pandemic. Those were also fields that had a high overall productivity among COVID articles. This is a reason for concern insofar as the current

1  
2  
3 scientific/medical response to one of the most incisive global crises could be overly  
4 dominated by men and missing expert voices by women that would usually be a vital  
5 part of this research.  
6  
7  
8  
9

10 Applying longitudinal analyses, we found that the much-increased gender gap  
11 in relevant fields was particularly noticeable early on and continuously trended back  
12 towards the baseline since then. However, recovery remains slow, with potential  
13 reasons being the extent of the impact, the fact that many fields with an above average  
14 share of women first authors were affected, but also because some of the most affected  
15 fields require in-person work, for example in wet labs (e.g. Biochemistry, Molecular  
16 Biology, Microbiology).  
17  
18  
19  
20  
21  
22  
23  
24  
25

26 Analyzing the change in the gender gap globally, we similarly found that the  
27 shares of women first authors declined across almost all continents early in the course  
28 of the pandemic in spring of 2020. Since then, the gender gap slowly began to close  
29 again towards the expected baseline and even reached baseline in North America and  
30 Oceania. Asia is the only continent where no significant reduction in women's first  
31 authorships were noted. In China, there was no change in gender composition among  
32 COVID publication when compared to control publications. In Taiwan and South  
33 Korea, a small increase in women first author shares was noted. Given that these  
34 countries together accounted for 4.2% of COVID publications in our dataset, and that  
35 gender designation algorithms tend to offer lower probability gender designations for  
36 Asian forenames, we are reluctant to conclusively interpret these findings. Of note, we  
37 applied a uniform probability threshold of 90% for designating an author's gender as a  
38 conservative measure.  
39  
40  
41  
42  
43  
44  
45  
46  
47  
48  
49  
50  
51  
52  
53  
54  
55

56 Even though our longitudinal analysis leads us to be cautiously optimistic that  
57 the impact of the pandemic on women's COVID research activity might have been  
58  
59  
60

1  
2  
3 temporary, we speculate that the absence of many expert women voices during the  
4 initial response to the pandemic impacted the individual researchers, but also society as  
5 a whole. While our study focused on COVID publications, the dynamics reported here  
6 may be amplified in research beyond COVID. Effects of the pandemic on early-stage  
7 or ongoing projects are likely to show with a time-delay and potentially have long-  
8 lasting consequences jeopardizing efforts toward equity in academia. For example,  
9 women at earlier career stages have not been able to allocate enough time to their  
10 research, manuscript and grant writing, were bound to remote working instead of in-  
11 person work, were potentially less likely to be allocated to leading roles on projects  
12 given the circumstances, etc.  
13  
14  
15  
16  
17  
18  
19  
20  
21  
22  
23  
24  
25

26 To avoid long-term impacts on the academic advancement and scientific  
27 contributions, the disproportionate impact of the pandemic on early career women  
28 investigators needs serious consideration and immediate actions. In a first step we  
29 would suggest for an open discourse about how the pandemic has highlighted systemic  
30 and structural barriers preventing gender equity in academia.<sup>25</sup> Naturally, pre-existing  
31 inequities must be evaluated, and a long-term strategy has to be established to support  
32 equity in science.<sup>26</sup> But more acutely, COVID-related gender inequities need to be  
33 addressed with direct measures, monetary and non-monetary, on both the political (e.g.  
34 federal funding agencies) and institutional level. For example, financial support for  
35 postdoctoral/graduate students could help to facilitate a research set-back in a recently  
36 established laboratory. Modifications for grant deadlines, timelines, extensions for  
37 granted expenses, as well as additional (bridge) funding programs, are likely warranted  
38 for early career mentored/independent investigators.<sup>27</sup> Extension of tenure evaluation  
39 and promotion should be considered on the individual level accounting for constraints  
40 posed by COVID for junior faculty (for both men and women). Resources for childcare  
41  
42  
43  
44  
45  
46  
47  
48  
49  
50  
51  
52  
53  
54  
55  
56  
57  
58  
59  
60

1  
2  
3 should be provided for parents, additional funds for expanded childcare arrangements  
4 could help to reallocate time to regular professional duties. However, it is as necessary  
5 to normalize the increased stress of living through a pandemic that not only affects  
6 professional obligations and goals, but also other family members and no penalty  
7 should be awarded for caregivers but measures mentioned above should rather allow  
8 for extra quality-time.<sup>28</sup>  
9  
10  
11  
12  
13  
14  
15  
16

17 Our study had several limitations. One limitation is that part of our large-scale  
18 study design was based on field-association by Clarivate Journal categories, which  
19 bears a potential risk of misclassification or inclusion of articles from journals that  
20 might not follow the norm of author ordering with regards to contribution that we  
21 assume for the life sciences and medicine. For example, one of the most affected fields  
22 in our data analysis is Public, Environmental and Occupational Health, where such  
23 norms might not be generalizable. However, previous research about the topic in Public  
24 Health, for example, also applied said authorship order norms and given the high  
25 relevance of the field and results, we decided to present the data.<sup>29</sup> Next, we relied on  
26 authors first names to designate their likely gender, which bears the risk of gender  
27 misclassification, particularly across different geographies. We attempted to minimize  
28 this risk by applying a 90% probability requirement, however, a certain level of  
29 uncertainty remains.<sup>30</sup> Also, by design of the gender designation algorithms grouping  
30 into two categories, namely 'man' and 'women' we cannot separate out an effect for  
31 scholars who are non-binary, transgender men and women. Along those lines, by virtue  
32 of the large-scale nature of our study, we acknowledge that we cannot draw conclusions  
33 for researchers on the individual level as well as confirm the assumed career stage.  
34 While our study focused on gender disparities for COVID-related research, it is  
35 important to note that, beyond gender diversity,<sup>31</sup> ethnic and cultural diversity benefit  
36  
37  
38  
39  
40  
41  
42  
43  
44  
45  
46  
47  
48  
49  
50  
51  
52  
53  
54  
55  
56  
57  
58  
59  
60

1  
2  
3 science on multiple levels.<sup>32</sup> With our analyses, however, we cannot comment on how  
4 the pandemic might have affected ethnic and cultural diversity with regards to COVID-  
5 related research or if populations under-represented in academic life sciences were  
6 similarly affected. Lastly, in this observational study, we cannot causally decipher the  
7 underlying mechanisms leading to women being underrepresented on COVID-related  
8 research, also precluding a definitive explanation for the trend back to baseline over  
9 time and what the potentially successful measures were or could be.  
10  
11  
12  
13  
14  
15  
16  
17  
18

19 In conclusion, we found that women first authors have been underrepresented  
20 in COVID-related research, particularly at the beginning of the pandemic, despite  
21 having nearly equal first authorship shares as men in pertinent fields prior to the  
22 pandemic.  
23  
24  
25  
26  
27  
28  
29  
30  
31  
32  
33  
34  
35  
36  
37  
38  
39  
40  
41  
42  
43  
44  
45  
46  
47  
48  
49  
50  
51  
52  
53  
54  
55  
56  
57  
58  
59  
60

## Figure Captions

### Figure 1. Overall gender differences in first and last authorships related to COVID publications.

Gender gap in first authorships for COVID publications (red) compared to the gender gap for control publications appearing in the same journals a year earlier (blue).

### Figure 2. Time-resolved gender differences in first authorship shares on COVID publications, by scientific discipline

Heatmap depicting the gender gap in first authorships for COVID publications and control publications from the same disciplines appearing in the same journals during the same period in the year prior to the pandemic. Fields sorted in descending order by number of publications. Red indicates an overrepresentation of women first authors, white indicates gender parity, blue indicates an overrepresentation of men first authors (in percentage points).

### Figure 3. Difference in first authorship gender gap, by country/geographical area

**a.** World map depicting the deviation in the gender gap in first authorships for COVID publications when compared to the expected gender gap derived from control publications from the same countries appearing in the same journals a year earlier. Red indicates an overrepresentation of women first authors, white indicates gender parity, blue indicates an overrepresentation of men first authors (in percentage points).

**b.** Time-resolved deviation in the gender gap in first authorships for COVID publications when compared to the expected gender gap derived from control publications from the same geographical area appearing in the same journals a year earlier (in percentage points).

## References

1. World Economic Forum. The Global Gender Gap Report 2017. [http://www3.weforum.org/docs/WEF\\_GGGR\\_2017pdf](http://www3.weforum.org/docs/WEF_GGGR_2017pdf) (accessed 08 June 2018)
2. O'Brien KR, Scheffer M, van Nes EH, et al. How to Break the Cycle of Low Workforce Diversity: A Model for Change. *PLoS one* 2015;10(7) doi: ARTN e0133208  
10.1371/journal.pone.0133208
3. Lerchenmuller C, Lerchenmueller MJ, Sorenson O. Long-Term Analysis of Sex Differences in Prestigious Authorships in Cardiovascular Research Supported by the National Institutes of Health. *Circulation* 2018;137(8):880-82. doi: 10.1161/CIRCULATIONAHA.117.032325
4. Blumenthal DM, Olenski AR, Yeh RW, et al. Sex Differences in Faculty Rank Among Academic Cardiologists in the United States. *Circulation* 2017;135(6):506-17. doi: 10.1161/CIRCULATIONAHA.116.023520
5. Holman L, Stuart-Fox D, Hauser CE. The gender gap in science: How long until women are equally represented? *PLoS Biol* 2018;16(4):e2004956. doi: 10.1371/journal.pbio.2004956 [published Online First: 2018/04/20]
6. Squazzoni F, Bravo, G., Grimaldo, F., Garcia-Costa, D., Farjam, M., Mehmani, B. Only Second-Class Tickets for Women in the COVID-19 Race. A Study on Manuscript Submissions and Reviews in 2329 Elsevier Journals. *SSRN Journal* 2020 [published Online First: October 16, 2020]

- 1  
2  
3 7. Krukowski RA, Jagsi R, Cardel MI. Academic Productivity Differences by Gender  
4 and Child Age in Science, Technology, Engineering, Mathematics, and  
5 Medicine Faculty During the COVID-19 Pandemic. *J Womens Health*  
6 (*Larchmt*) 2020 doi: 10.1089/jwh.2020.8710 [published Online First:  
7 2020/11/21]  
8
- 9 8. Mogensen MA, Lee, C.I., Carlos, R.C. The Impact of the COVID-19 Pandemic on  
10 Journal Scholarly Activity Among Female Contributors. *Journal of the*  
11 *American College of Radiology* 2021 doi:  
12 <https://doi.org/10.1016/j.jacr.2021.01.011>  
13
- 14 9. Andersen JP, Nielsen MW, Simone NL, et al. COVID-19 medical papers have  
15 fewer women first authors than expected. *Elife* 2020;9 doi:  
16 10.7554/eLife.58807 [published Online First: 2020/06/17]  
17
- 18 10. Kibbe MR. Consequences of the COVID-19 Pandemic on Manuscript  
19 Submissions by Women. *JAMA Surg* 2020;155(9):803-04. doi:  
20 10.1001/jamasurg.2020.3917 [published Online First: 2020/08/05]  
21
- 22 11. Pinho-Gomes AC, Peters S, Thompson K, et al. Where are the women? Gender  
23 inequalities in COVID-19 research authorship. *BMJ Glob Health* 2020;5(7)  
24 doi: 10.1136/bmjgh-2020-002922 [published Online First: 2020/06/13]  
25
- 26 12. Yildirim TM, Eslen-Ziya H. The Differential Impact of COVID-19 on the Work  
27 Conditions of Women and Men Academics during the Lockdown. *Gend Work*  
28 *Organ* 2020 doi: 10.1111/gwao.12529 [published Online First: 2020/09/10]  
29
- 30 13. Staniscuaski F, Reichert F, Werneck FP, et al. Impact of COVID-19 on academic  
31 mothers. *Science* 2020;368(6492):724. doi: 10.1126/science.abc2740  
32 [published Online First: 2020/05/16]  
33
- 34 14. Oleschuk M. Gender Equity Considerations for Tenure and Promotion during  
35 COVID-19. *Can Rev Sociol* 2020;57(3):502-15. doi: 10.1111/cars.12295  
36 [published Online First: 2020/08/12]  
37
- 38 15. Kitchener C. Women academics seem to be submitting fewer papers during  
39 coronavirus . 'Never seen anything like it,' says one editor. *The Lily / The*  
40 *Washington Post* 2020 April 24, 2020.
- 41 16. Myers KR, Tham WY, Yin Y, et al. Unequal effects of the COVID-19 pandemic  
42 on scientists. *Nat Hum Behav* 2020;4(9):880-83. doi: 10.1038/s41562-020-  
43 0921-y [published Online First: 2020/07/17]  
44
- 45 17. Czymara CS, Langenkamp A, Cano T. Cause for concerns: gender inequality in  
46 experiencing the COVID-19 lockdown in Germany. *European Societies*  
47 2020;1-14. doi: 10.1080/14616696.2020.1808692  
48
- 49 18. Antecol H, Bedard K, Stearns J. Equal but Inequitable: Who Benefits from  
50 Gender-Neutral Tenure Clock Stopping Policies? *American Economic Review*  
51 2018;108(9):2420-41. doi: 10.1257/aer.20160613  
52
- 53 19. Jagsi R, Guancial EA, Worobey CC, et al. The "gender gap" in authorship of  
54 academic medical literature--a 35-year perspective. *The New England journal*  
55 *of medicine* 2006;355(3):281-7. doi: 10.1056/NEJMsa053910 [published  
56 Online First: 2006/07/21]  
57
- 58 20. Clarivate. 2018 Journal Citation Reports 2018 [Available from:  
59 [https://clarivate.com/webofsciencegroup/wp-](https://clarivate.com/webofsciencegroup/wp-content/uploads/sites/2/2019/10/Crv_JCR_Full-Marketing-List_A4_2018_v4.pdf)  
60 [content/uploads/sites/2/2019/10/Crv\\_JCR\\_Full-Marketing-](https://clarivate.com/webofsciencegroup/wp-content/uploads/sites/2/2019/10/Crv_JCR_Full-Marketing-List_A4_2018_v4.pdf)  
[List\\_A4\\_2018\\_v4.pdf](https://clarivate.com/webofsciencegroup/wp-content/uploads/sites/2/2019/10/Crv_JCR_Full-Marketing-List_A4_2018_v4.pdf) accessed 20 February 2020.
21. BCG. Easing the covid-19 burden on working parents 2020 [Available from:  
[https://www.bcg.com/en-us/publications/2020/helping-working-parents-ease-](https://www.bcg.com/en-us/publications/2020/helping-working-parents-ease-the-burden-of-covid-19.aspx)  
[the-burden-of-covid-19.aspx](https://www.bcg.com/en-us/publications/2020/helping-working-parents-ease-the-burden-of-covid-19.aspx) accessed 14 September 2020.



- 1  
2  
3  
4  
5  
6  
7  
8  
9  
10  
11  
12  
13  
14  
15  
16  
17  
18  
19  
20  
21  
22  
23  
24  
25  
26  
27  
28  
29  
30  
31  
32  
33  
34  
35  
36  
37  
38  
39  
40  
41  
42  
43  
44  
45  
46  
47
22. Clark J, Horton R. What is The Lancet doing about gender and diversity? *Lancet* 2019;393(10171):508-10. doi: 10.1016/S0140-6736(19)30289-2 [published Online First: 2019/02/12]
  23. Holmes A, Hardy S. Gender bias in peer review—opening up the black box. *London, UK: London School of Economics* 2019
  24. Pinho-Gomes AC. The Time Is Ripe for Addressing Gender Inequalities in the Authorship of Scientific Papers. *Am J Public Health* 2021;111(1):15-16. doi: 10.2105/AJPH.2020.306028 [published Online First: 2020/12/17]
  25. Coe IR, Wiley R, Bekker LG. Organisational best practices towards gender equality in science and medicine. *Lancet* 2019;393(10171):587-93. doi: 10.1016/S0140-6736(18)33188-X [published Online First: 2019/02/12]
  26. Malisch JL, Harris BN, Sherrer SM, et al. Opinion: In the wake of COVID-19, academia needs new solutions to ensure gender equity. *Proceedings of the National Academy of Sciences of the United States of America* 2020;117(27):15378-81. doi: 10.1073/pnas.2010636117 [published Online First: 2020/06/20]
  27. Gibson EM, Bennett FC, Gillespie SM, et al. How Support of Early Career Researchers Can Reset Science in the Post-COVID19 World. *Cell* 2020;181(7):1445-49. doi: 10.1016/j.cell.2020.05.045 [published Online First: 2020/06/14]
  28. Spinelli M, Lionetti F, Pastore M, et al. Parents' Stress and Children's Psychological Problems in Families Facing the COVID-19 Outbreak in Italy. *Front Psychol* 2020;11:1713. doi: 10.3389/fpsyg.2020.01713 [published Online First: 2020/07/29]
  29. Bittante C, Beatrice G, Carletti L, et al. Gender disparity in authorships of manuscripts on the COVID-19 outbreak. *Z Gesundh Wiss* 2020:1-2. doi: 10.1007/s10389-020-01323-x [published Online First: 2020/08/25]
  30. Lerchenmueller MJ, Sorenson O, Jena AB. Gender differences in how scientists present the importance of their research: observational study. *Bmj* 2019;367:l6573. doi: 10.1136/bmj.l6573 [published Online First: 2019/12/18]
  31. Nielsen MW, Alegria S, Borjeson L, et al. Opinion: Gender diversity leads to better science. *Proceedings of the National Academy of Sciences of the United States of America* 2017;114(8):1740-42. doi: 10.1073/pnas.1700616114 [published Online First: 2017/02/24]
  32. Science benefits from diversity. *Nature* 2018;558(7708):5. doi: 10.1038/d41586-018-05326-3 [published Online First: 2019/05/12]

#### 48 **Availability of data and materials**

49  
50 All data and source code generated and analyzed during the current study will be made  
51  
52 publicly available with publication of this article.  
53  
54  
55  
56  
57  
58  
59  
60

### **Conflicts of interest**

Dr. Jena reports receiving consulting fees unrelated to this work from Pfizer, Hill Rom Services, Bristol Myers Squibb, Novartis, Amgen, Eli Lilly, Vertex Pharmaceuticals, AstraZeneca, Celgene, Tesaro, Sanofi Aventis, Biogen, Precision Health Economics, and Analysis Group. Also unrelated to this work, Dr. Lerchenmueller reports serving on the board of AaviGen.

### **Funding**

Support was provided by the Office of the Director, National Institutes of Health (1DP5OD017897, Dr. Jena). The funding sources had no role in the design and conduct of the study; collection, management, analysis, and interpretation of the data; and preparation, review, or approval of the manuscript.

### **Author's contributions**

LS and MJL collected data, LS, MJL and CL performed data analysis. CL, MJL, ABJ wrote the manuscript, LS edited the manuscript. All authors read and approved the final manuscript. Patients and public did not contribute to the study.

### **Acknowledgements**

The authors acknowledge support by the German state of Baden-Württemberg through bwHPC—high performance cluster computing resources. The authors also thank Tobias Engel and Felix Fieberg for supporting data collection and literature review.

### **Supplementary Materials**

Detailed methods and supporting data are available in the supplementary materials.

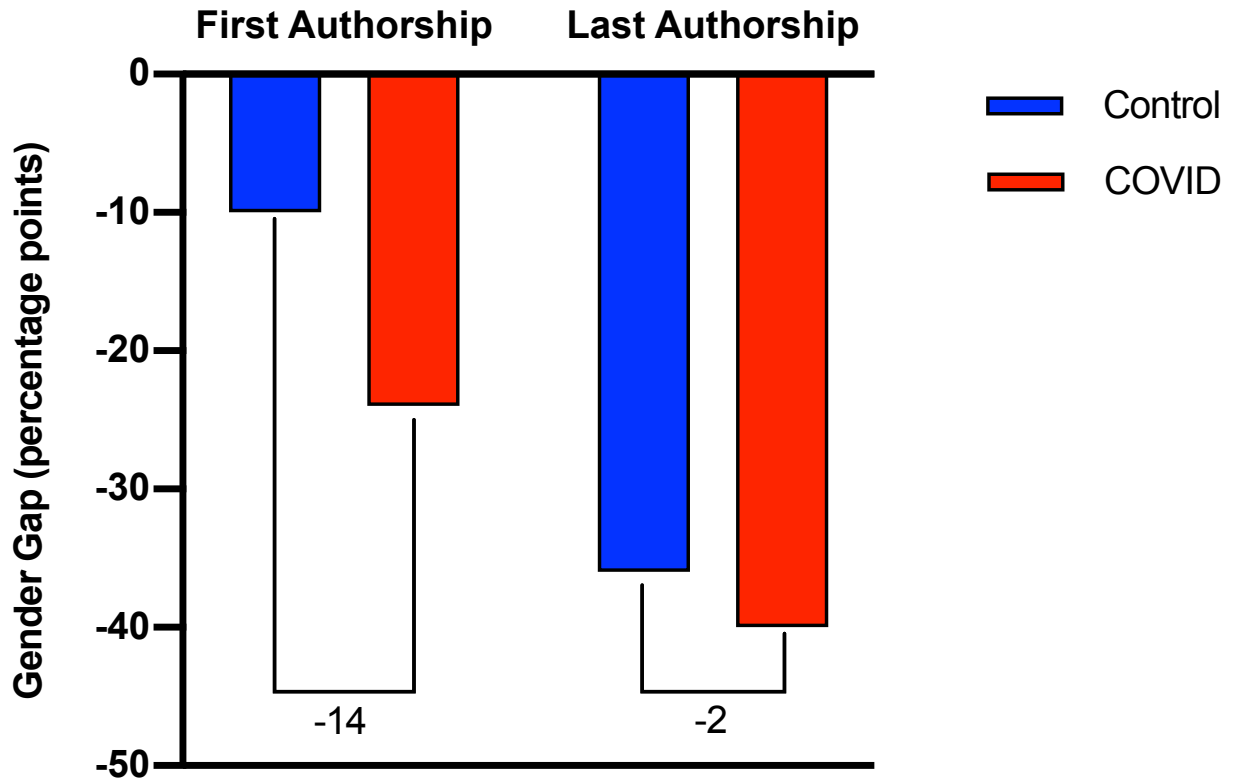

**Figure 1. Overall gender differences in first and last authorships related to COVID publications.**

Gender gap in first authorships for COVID publications (red) compared to the gender gap for control publications appearing in the same journals a year earlier (blue).

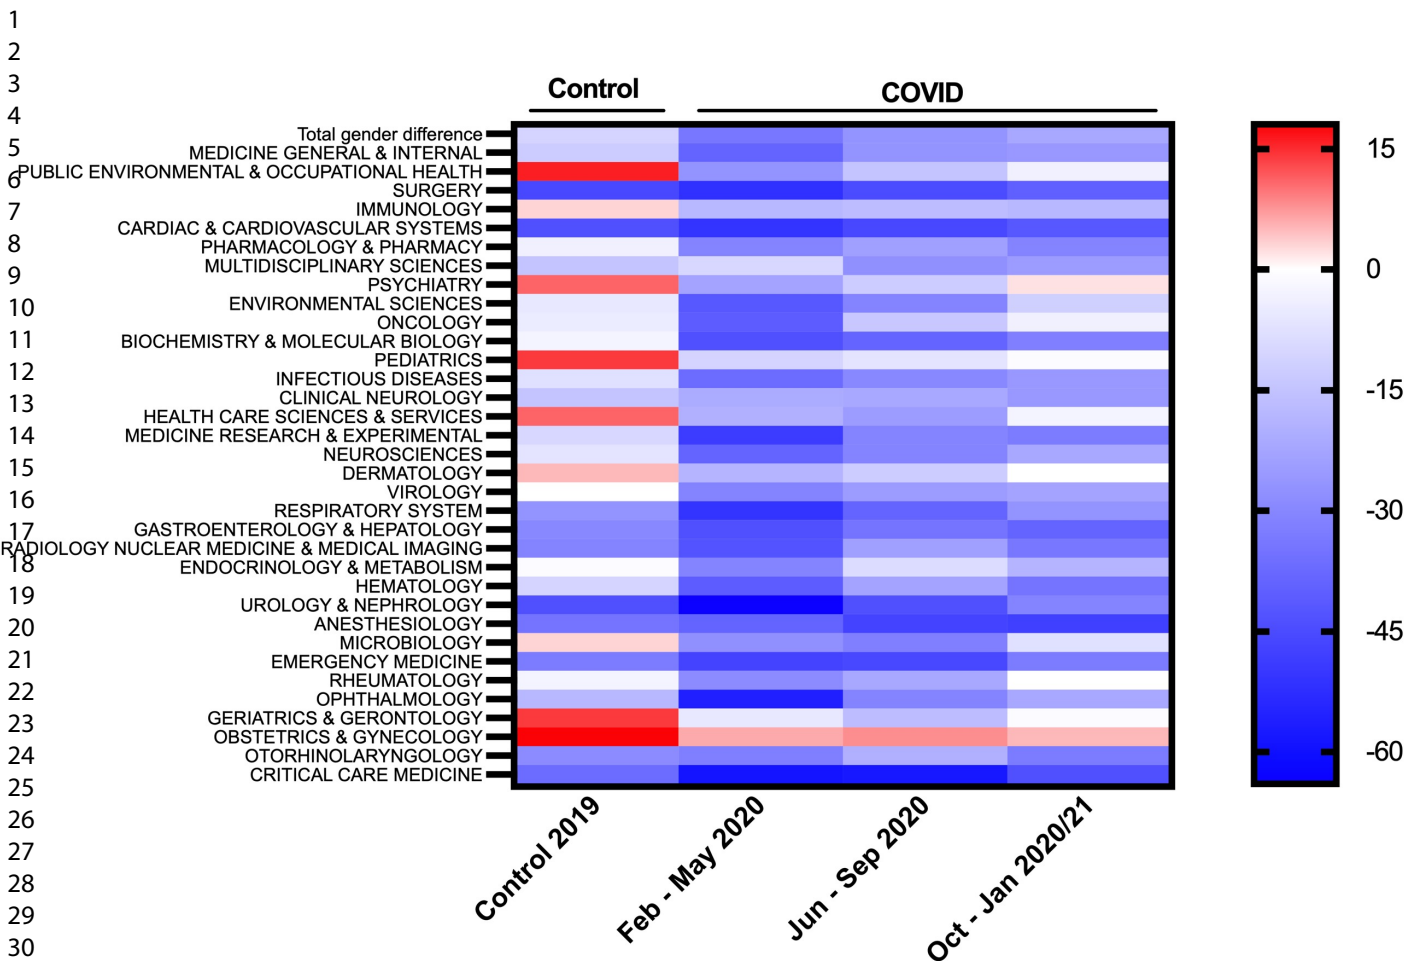

**Figure 2. Time-resolved gender differences in first authorship shares on COVID publications, by scientific discipline**

Heatmap depicting the gender gap in first authorships for COVID publications and control publications from the same disciplines appearing in the same journals during the same period in the year prior to the pandemic. Fields sorted in descending order by number of publications. Red indicates an overrepresentation of women first authors, white indicates gender parity, blue indicates an overrepresentation of men first authors (in percentage points).

1  
2  
3  
4  
5  
6  
7  
8  
9  
10  
11  
12  
13  
14  
15  
16  
17  
18  
19  
20  
21  
22  
23  
24  
25  
26  
27  
28  
29  
30  
31  
32  
33  
34  
35  
36  
37  
38  
39  
40  
41  
42  
43  
44  
45  
46  
47  
48  
49  
50  
51  
52  
53  
54  
55  
56

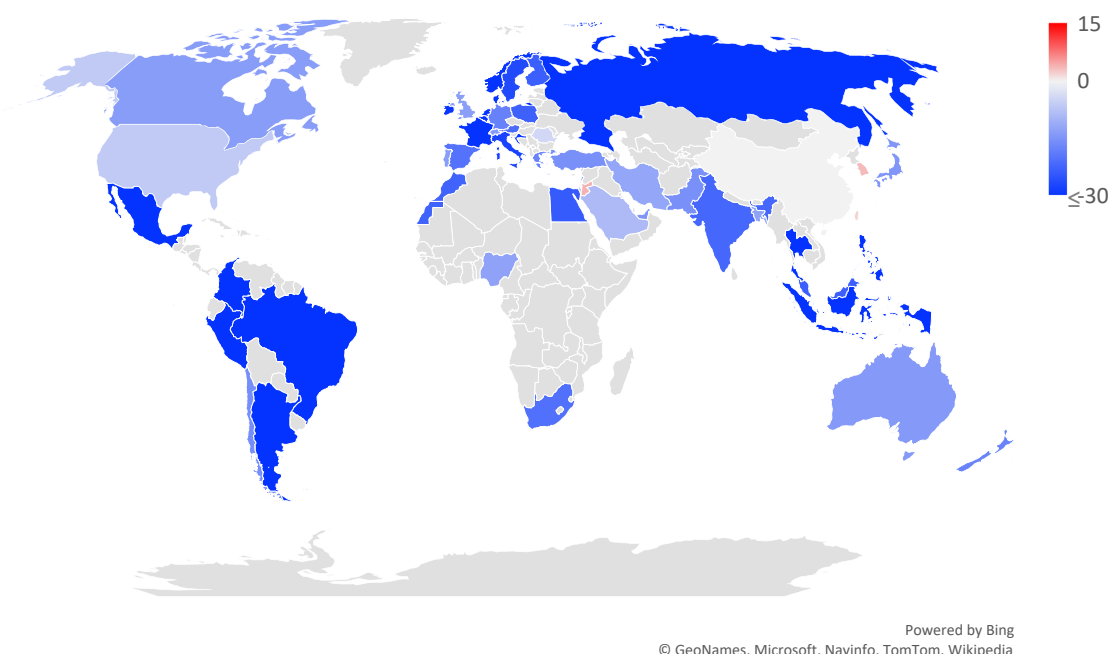

Powered by Bing  
© GeoNames, Microsoft, Navinfo, TomTom, Wikipedia

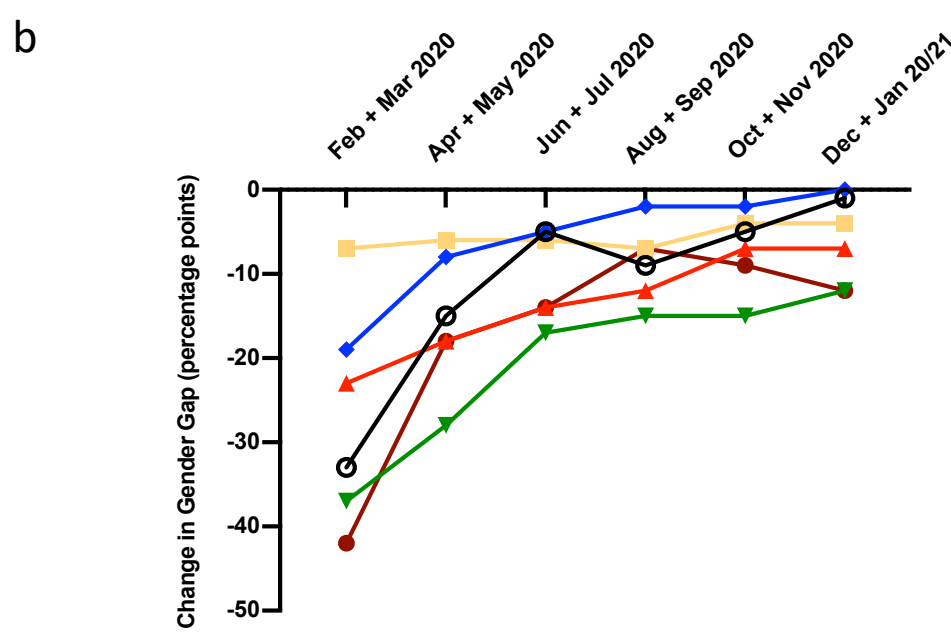

**Figure 3. Difference in first authorship gender gap, by country/geographical area**  
**a.** World map depicting the deviation in the gender gap in first authorships for COVID publications when compared to the expected gender gap derived from control publications from the same countries appearing in the same journals a year earlier. Red indicates an overrepresentation of women first authors, white indicates gender parity, blue indicates an overrepresentation of men first authors (in percentage points). **b.** Time-resolved deviation in the gender gap in first authorships for COVID publications when compared to the expected gender gap derived from control publications from the same continent appearing in the same journals a year earlier (in percentage points).

## Supplementary materials for

### Longitudinal Analyses of Gender Differences in First Authorship Publications Related to COVID-19

Carolyn Lerchenmüller, MD, Leo Schmallenbach, MSc,  
Anupam B. Jena, MD, PhD, Marc J. Lerchenmüller, MPH, PhD

#### Table of Contents

Additional information on data (page 2)

Additional information on methods (page 3)

References (page 4)

**Figure S1:** Sample construction for COVID articles and non-COVID (control) articles

**Figure S2:** Gender designation accuracy for first authors from North America, Latin America, Europe, Asia, Oceania, and Africa separately

**Figure S3:** Gender designation accuracy for COVID articles and non-COVID (control) articles for women and men first authors

**Figure S4:** Gender designation accuracy for women first authors for COVID articles and non-COVID (control) articles separately

**Table S1:** Major disciplines for COVID articles and non-COVID (control) articles and concordance statistics

**Table S2:** Major countries for COVID articles and non-COVID (control) articles and concordance statistics

**Table S3:** Hierarchical linear probability model for the likelihood of women first authorship for COVID articles versus non-COVID (control) articles

**Table S4:** Hierarchical linear probability model for the likelihood of women last authorship for COVID articles versus non-COVID (control) articles

**Table S5:** Hierarchical logistic regression for the likelihood of women first authorship for COVID articles versus non-COVID (control) articles

**Table S6:** Robustness checks

**Table S7:** Descriptive statistics of articles included in the analysis versus articles not included in the analysis

### Additional Information on Data

We merged several databases to analyze potential gender differences in first authorships of COVID publications relative to a set of control publications in the same journals and within the same time period one year earlier. First, we extracted all articles from the PubMed database for which the term “COVID” appeared in the title or abstract and obtained all available article characteristics including, among others, the names of all authors, country affiliation per author, the journal ISSN (International Standard Serial Number), and time of publication (months and year). The U.S. National Library of Medicine maintains the PubMed XML database and a detailed data inventory can be found online ([https://www.nlm.nih.gov/databases/download/pubmed\\_medline.html](https://www.nlm.nih.gov/databases/download/pubmed_medline.html)). We obtained the journals’ major scientific discipline from the Clarivate Journal Citation Report of 2018 via the unique journal ISSNs. We used journal names as a crosswalk to identify publications that appeared a year earlier in the exact same journals as the COVID articles.

An overview of the sample creation is provided in **Figure S1**. In service of estimation accuracy, we included only journals that are listed in Clarivate. By construction that excludes all COVID publications in journals that had no publication on record in PubMed for 2019. These journals likely only came into being in 2020. We restricted our search query to articles published between February 1<sup>st</sup> of 2020 and January 31<sup>st</sup> of 2021, since these months were the most productive in terms of COVID publishing and we sought to mitigate seasonal influences, like gender differences in teaching load at certain times of year.

We used the forenames recorded in PubMed to designate the gender of authors (PubMed started to systematically record forenames in 2002). We determined the probable gender of the authors through the Genderize database, an established approach that allows gender assignment for a large number of authors. At the time of initial submission, Genderize included 86,710 distinct forenames drawn from 74 countries and 81 languages. Recent tests of the accuracy and comprehensiveness of four gender assignment algorithms, using a control sample of gender-matched forenames from a US government office, found that Genderize provided the most accurate estimates of gender (1). Our underlying code for calling the Genderize database with a large set of forenames has been posted to Figshare (2). Genderize uses a variety of information, such as social media records, to assign a probability that an individual with a particular forename is a man or a woman. For example, Genderize designates the forename “Chris” as male with 93% probability based on 8,631 verified records in the database. We considered gender determined if Genderize assigned a probability of greater than 90%. Applying this threshold, we designated the gender for more than 72% of the authors in our dataset. However, there is variation across author origins (**Figure S2**). For example, we designated the gender for 84% of authors with an affiliation from North America and for 52% of authors with an affiliation from Asia. The lower accuracy for authors from Asia is a common challenge in name-based gender designation and a limitation to our analysis of authors from these countries. Yet, there is no difference in the accuracy of gender designation across men and women authors (**Figure S3**) or COVID and non-COVID

articles (**Figure S4**). Hence, there is no reason to be concerned that the gender designation would systematically bias our results. Additionally, our main findings do not change when setting different gender designation thresholds.

Next, we compared the distribution of disciplines producing COVID research relative to the articles in the control sample (**Table S1**). Ranking the disciplines in terms of publication output, and testing a Spearman Rank correlation, we obtain a coefficient of greater 0.80. While this correlation would generally be considered strong (3) lending credence to our basic design, it does not consider the possibility that men and women may sort differently into these fields. However, our **Figure 2** in the main text documents that it is primarily fields where women tend to be well represented that produce COVID research.

To execute country-level analyses, we use regular expressions to extract the full country name or country codes from affiliation data for the first author. We also ranked countries by productivity for COVID-articles and control articles, obtaining a Spearman rank correlation of 0.94, again supporting our approach of using non-COVID articles in the prior year as a control group (**Table S2**). This also mitigates concerns that countries with larger gender gaps in general produce more COVID research.

## Additional information on methods

### Measurement

To assess the effect of the COVID pandemic on the gender gap in publishing, we reported unadjusted differences in the percent of women first authorships versus male first authorships for COVID and non-COVID publications. This straightforward metric provides a direct and easy to understand measure of how the COVID pandemic impacts women's versus men's publication productivity.

$$\Delta GenderGap = \{FirstAuthor_{Female} - FirstAuthor_{Male} | COVID\} - \{FirstAuthor_{Female} - FirstAuthor_{Male} | Non - COVID\}$$

To conduct subgroup analysis for discipline and country, we calculated the change in the gender gap based on the percent of first authorships by men and women for the specific discipline and country.

### Estimation

In addition to the unadjusted differences, we also provided adjusted differences in first authorships from women and men obtained from linear probability models (**Table S3**), adjusting for the number of authors on a publication, the month of publication, the field of research and country. We run the same analysis for last authorships from women and



men (**Table S4**). Both regression analyses support the descriptive evidence presented in Figure 1 of the main text. Logistic regression as an alternative estimation model has two disadvantages in our analysis. First, the large number of fixed effects when including countries and discipline dummies, for example, raises the possibility of incidental parameters bias and could prevent the convergence of some of our models. Second, logistic regressions can overestimate effect sizes as a result of the high leverage of marginal cases (i.e., identifying larger gender differences than reported in the main text), whereas linear probability models average across observations and produce more conservative results (see also **Table S5**).

We provided adjusted estimates in the supplement as one might be concerned, for example, that men are more numerous in fields that produce COVID research. This would also lower women's observed COVID productivity but not due to pandemic related constraints as hypothesized, but rather due to underlying structural differences in subspecialties. Of note, the descriptive data paint a different picture, such that women tend to be at least equal if not overrepresented in the most productive COVID disciplines.

We conducted four robustness checks to establish the reliability of our findings (**Table S6**). In the first two robustness checks, we vary the threshold applied to the accuracy of the gender designation. In Model 1, we consider all authors, for which gender was assigned with a probability higher than chance (>50%). In Model 2, we only consider authors, for which the gender designation accuracy was reported with 100%. Both models show very similar estimates for the decrease in women authorship on COVID publications (8.2%-points vs. 9.0%-points). Next, we excluded articles from the analysis, for which collective authorship was indicated in PubMed. This concerns roughly 8% of articles but excluding them does not alter the effect estimate. Last, we reran the analysis on the full sample, that is including COVID articles published in journals, which are not listed in Clarivate's journal citation report and for which the first author's gender could be designated. As we do not know the disciplines these journals fall into, we include journal instead of discipline fixed effects in this last model specification. Again, the results are consistent with our previous analysis. Accordingly, a descriptive comparison of the articles in- and excluded from the analysis shows that they are near identical with respect to the representation of women first and last authors (**Table S7**).

## References

1. C. N. G. detection, (<http://codingnews.info/post/genderdetection> (accessed 11/15/17) (2015)).
2. Lerchenmueller. Marc, *Genderize\_unlimited\_API\_request*. (2017).
3. M. G. Pagano, Kimberlee, *Principle of Biostatistics*. (Brooks/Cole, ed. Second Edition, 2000).

**Figure S1:** Sample construction for COVID articles and non-COVID (control) articles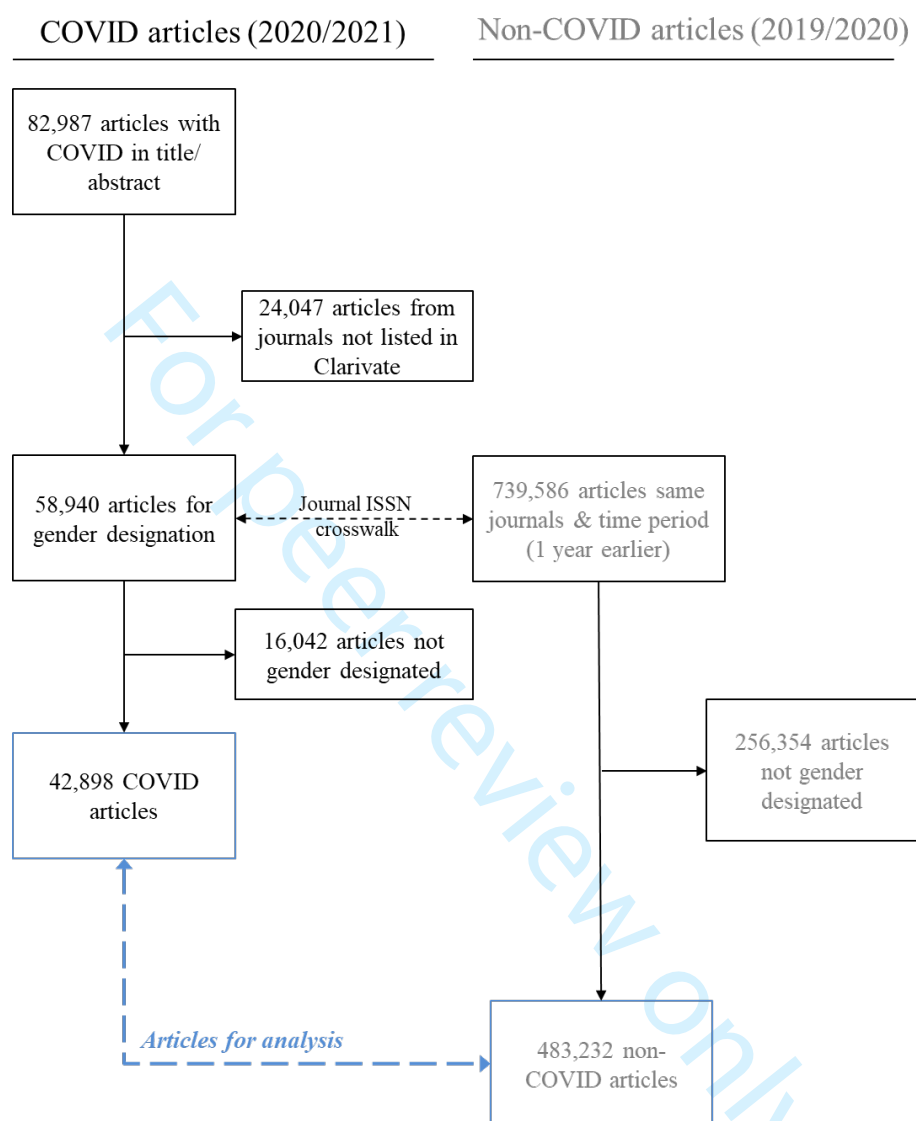

**Figure S2:** Gender designation accuracy for first authors from North America, Latin America, Europe, Asia, Oceania, and Africa separately

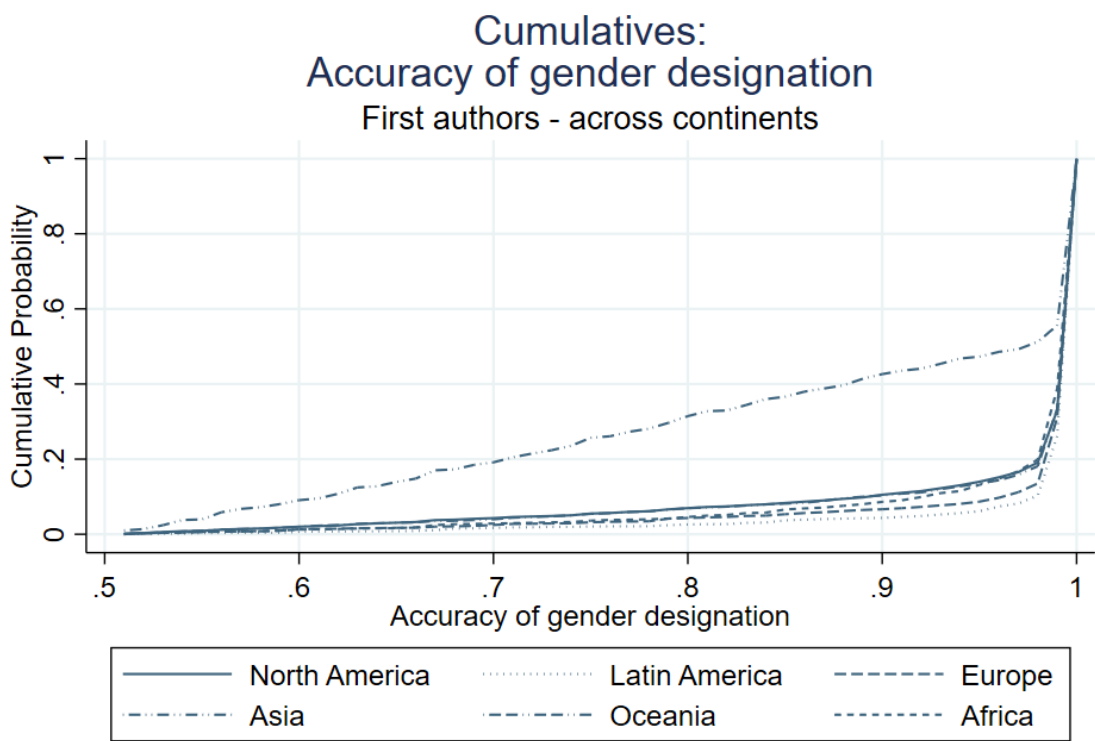

ew only

**Figure S3:** Gender designation accuracy for all articles in the sample (COVID articles and non-COVID articles) for women and men first authors

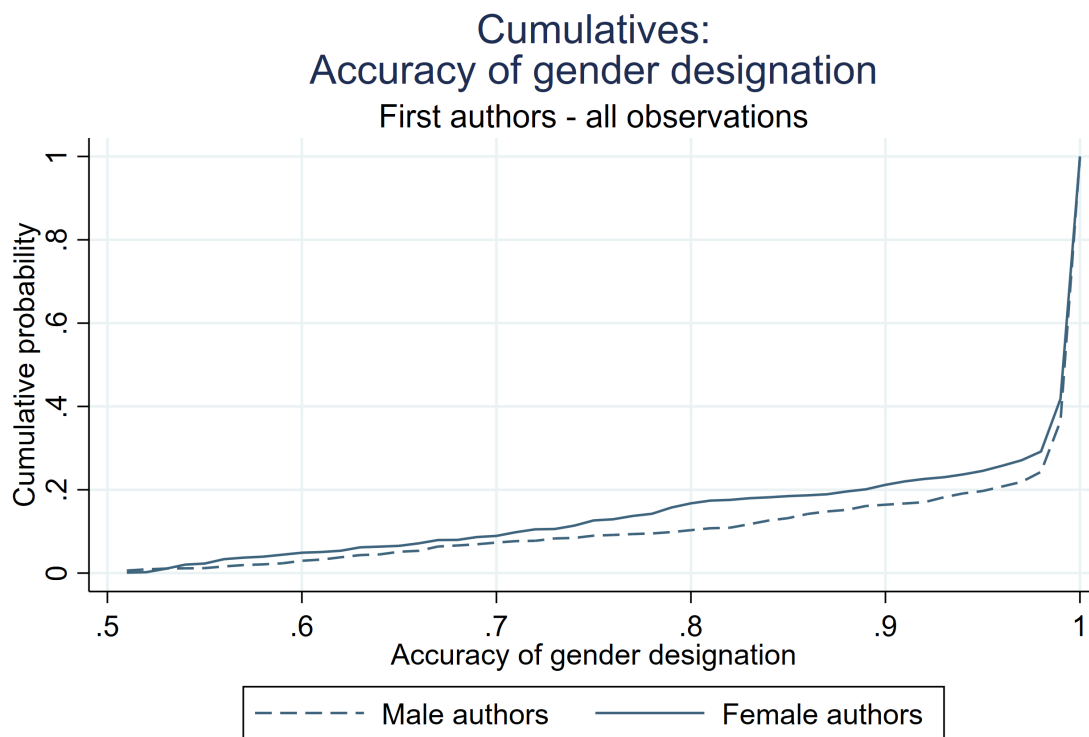

\*Note: based on 349,489 male 296,937 female first authors

Peer review only

**Figure S4:** Gender designation accuracy for women first authors for COVID articles and non-COVID (control) articles separately

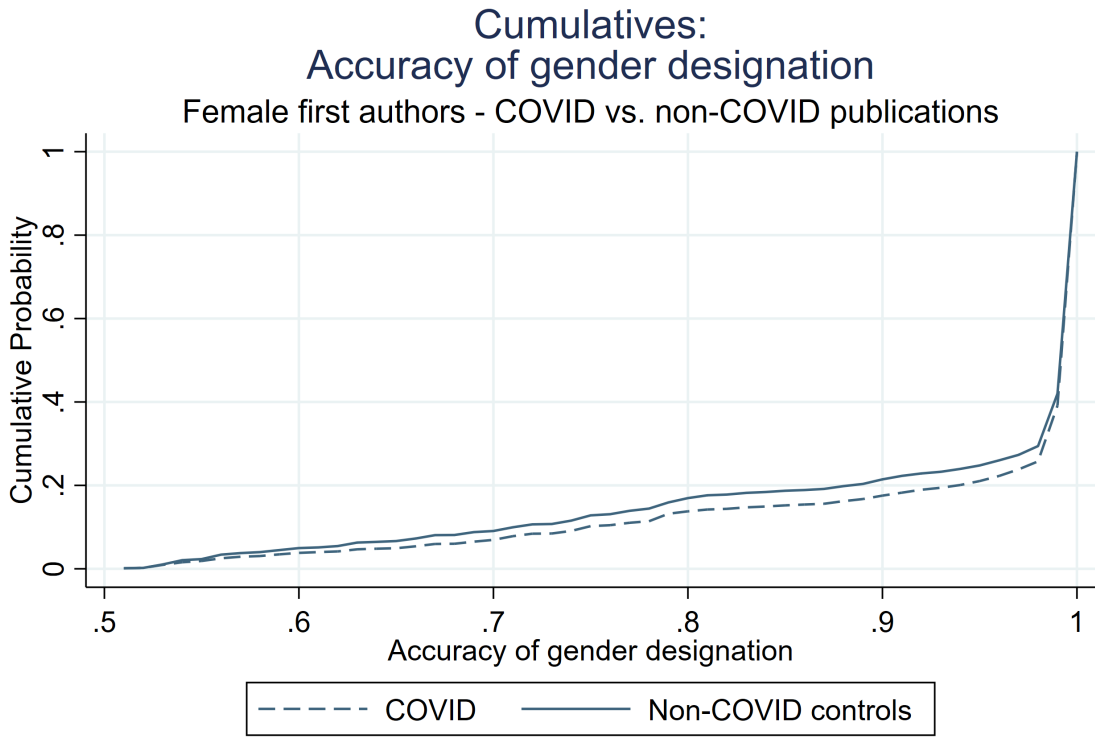

\*Note: based on 296,937 female first authors

Peer Review Only

**Table S1:** Major disciplines for COVID articles and non-COVID (control) articles and concordance statistic

| Discipline                                         | Non-COVID |       |      | COVID |       |      | Total  |       |      |
|----------------------------------------------------|-----------|-------|------|-------|-------|------|--------|-------|------|
|                                                    | Total     | %     | Rank | Total | %     | Rank | Total  | %     | Rank |
| MEDICINE GENERAL & INTERNAL                        | 23,163    | 4.79% | 5    | 4,229 | 9.88% | 1    | 27,392 | 5.21% | 4    |
| PUBLIC ENVIRONMENTAL & OCCUPATIONAL HEALTH SURGERY | 17,860    | 3.70% | 8    | 3,530 | 8.24% | 2    | 21,390 | 4.07% | 6    |
| IMMUNOLOGY                                         | 26,457    | 5.48% | 3    | 2,254 | 5.26% | 3    | 28,711 | 5.46% | 3    |
| CARDIAC & CARDIOVASCULAR SYSTEMS                   | 11,151    | 2.31% | 12   | 1,925 | 4.50% | 4    | 13,076 | 2.49% | 11   |
| PHARMACOLOGY & PHARMACY                            | 16,196    | 3.35% | 9    | 1,479 | 3.45% | 5    | 17,675 | 3.36% | 9    |
| MULTIDISCIPLINARY SCIENCES                         | 18,408    | 3.81% | 7    | 1,439 | 3.36% | 6    | 19,847 | 3.77% | 8    |
| PSYCHIATRY                                         | 38,524    | 7.97% | 1    | 1,435 | 3.35% | 7    | 39,959 | 7.60% | 1    |
| ENVIRONMENTAL SCIENCES                             | 9,890     | 2.05% | 14   | 1,333 | 3.11% | 8    | 11,223 | 2.13% | 14   |
| ONCOLOGY                                           | 19,607    | 4.06% | 6    | 1,278 | 2.98% | 9    | 20,885 | 3.97% | 7    |
| BIOCHEMISTRY & MOLECULAR BIOLOGY                   | 23,207    | 4.80% | 4    | 1,159 | 2.71% | 10   | 24,366 | 4.63% | 5    |
| PEDIATRICS                                         | 30,224    | 6.25% | 2    | 1,118 | 2.61% | 11   | 31,342 | 5.96% | 2    |
| INFECTIOUS DISEASES                                | 10,280    | 2.13% | 13   | 1,105 | 2.58% | 12   | 11,385 | 2.16% | 13   |
| CLINICAL NEUROLOGY                                 | 3,143     | 0.65% | 41   | 1,001 | 2.34% | 13   | 4,144  | 0.79% | 37   |
| HEALTH CARE SCIENCES & SERVICES                    | 9,614     | 1.99% | 15   | 922   | 2.15% | 14   | 10,536 | 2.00% | 15   |
| MEDICINE RESEARCH & EXPERIMENTAL NEUROSCIENCES     | 5,209     | 1.08% | 29   | 921   | 2.15% | 15   | 6,130  | 1.17% | 27   |
| DERMATOLOGY                                        | 5,645     | 1.17% | 25   | 887   | 2.07% | 16   | 6,532  | 1.24% | 25   |
| VIROLOGY                                           | 14,611    | 3.02% | 10   | 835   | 1.95% | 17   | 15,446 | 2.94% | 10   |
| RESPIRATORY SYSTEM                                 | 5,452     | 1.13% | 26   | 777   | 1.81% | 18   | 6,229  | 1.18% | 26   |
| GASTROENTEROLOGY & HEPATOLOGY                      | 2,198     | 0.45% | 47   | 771   | 1.80% | 19   | 2,969  | 0.56% | 43   |
| RADIOLOGY NUCLEAR MEDICINE & MEDICAL IMAGING       | 4,074     | 0.84% | 35   | 732   | 1.71% | 20   | 4,806  | 0.91% | 32   |
| ENDOCRINOLOGY & METABOLISM                         | 6,367     | 1.32% | 23   | 719   | 1.68% | 21   | 7,086  | 1.35% | 22   |
| HEMATOLOGY                                         | 7,092     | 1.47% | 20   | 715   | 1.67% | 22   | 7,807  | 1.48% | 19   |
| UROLOGY & NEPHROLOGY                               | 6,468     | 1.34% | 22   | 628   | 1.47% | 23   | 7,096  | 1.35% | 21   |
| ANESTHESIOLOGY                                     | 4,449     | 0.92% | 31   | 618   | 1.44% | 24   | 5,067  | 0.96% | 31   |
| MICROBIOLOGY                                       | 7,369     | 1.52% | 18   | 581   | 1.36% | 25   | 7,950  | 1.51% | 18   |
| NURSING                                            | 2,100     | 0.43% | 48   | 519   | 1.21% | 26   | 2,619  | 0.50% | 44   |
| EMERGENCY MEDICINE                                 | 6,086     | 1.26% | 24   | 499   | 1.17% | 27   | 6,585  | 1.25% | 24   |
| RHEUMATOLOGY                                       | 4,602     | 0.95% | 30   | 484   | 1.13% | 28   | 5,086  | 0.97% | 30   |
| PSYCHOLOGY MULTIDISCIPLINARY                       | 1,958     | 0.41% | 52   | 459   | 1.07% | 29   | 2,417  | 0.46% | 48   |
| OPHTHALMOLOGY                                      | 3,146     | 0.65% | 40   | 455   | 1.06% | 30   | 3,601  | 0.68% | 40   |
| GERIATRICS & GERONTOLOGY                           | 3,271     | 0.68% | 38   | 413   | 0.96% | 31   | 3,684  | 0.70% | 39   |
| OBSTETRICS & GYNECOLOGY                            | 5,303     | 1.10% | 27   | 412   | 0.96% | 32   | 5,715  | 1.09% | 28   |
| CELL BIOLOGY                                       | 1,818     | 0.38% | 55   | 392   | 0.92% | 33   | 2,210  | 0.42% | 52   |
| OTORHINOLARYNGOLOGY                                | 4,388     | 0.91% | 32   | 353   | 0.82% | 34   | 4,741  | 0.90% | 33   |
| CRITICAL CARE MEDICINE                             | 8,490     | 1.76% | 16   | 352   | 0.82% | 35   | 8,842  | 1.68% | 16   |
| DENTISTRY ORAL SURGERY & MEDICINE                  | 2,098     | 0.43% | 49   | 303   | 0.71% | 36   | 2,401  | 0.46% | 49   |
| ECONOMICS                                          | 2,018     | 0.42% | 50   | 282   | 0.66% | 37   | 2,300  | 0.44% | 50   |
| BIOTECHNOLOGY & APPLIED MICROBIOLOGY               | 3,212     | 0.66% | 39   | 275   | 0.64% | 38   | 3,487  | 0.66% | 41   |
| NUTRITION & DIETETICS                              | 495       | 0.10% | 81   | 274   | 0.64% | 39   | 769    | 0.15% | 74   |
| PSYCHOLOGY CLINICAL                                | 4,021     | 0.83% | 36   | 246   | 0.57% | 40   | 4,267  | 0.81% | 34   |
| ETHICS                                             | 5,241     | 1.08% | 28   | 229   | 0.53% | 41   | 5,470  | 1.04% | 29   |
| MEDICAL LABORATORY TECHNOLOGY                      | 2,392     | 0.50% | 43   | 210   | 0.49% | 42   | 2,602  | 0.49% | 45   |
| SPORT SCIENCES                                     | 674       | 0.14% | 75   | 195   | 0.46% | 43   | 869    | 0.17% | 71   |
| PATHOLOGY                                          | 1,217     | 0.25% | 63   | 185   | 0.43% | 44   | 1,402  | 0.27% | 61   |
| GENETICS & HEREDITY                                | 3,065     | 0.63% | 42   | 182   | 0.43% | 45   | 3,247  | 0.62% | 42   |
| ORTHOPEDICS                                        | 2,011     | 0.42% | 51   | 181   | 0.42% | 46   | 2,192  | 0.42% | 53   |
| PERIPHERAL VASCULAR DISEASE                        | 7,184     | 1.49% | 19   | 178   | 0.42% | 47   | 7,362  | 1.40% | 20   |
| MATHEMATICS INTERDISCIPLINARY APPLICATIONS         | 2,345     | 0.49% | 44   | 168   | 0.39% | 48   | 2,513  | 0.48% | 46   |
|                                                    | 1,700     | 0.35% | 57   | 133   | 0.31% | 49   | 1,833  | 0.35% | 56   |
|                                                    | 70        | 0.01% | 120  | 126   | 0.29% | 50   | 196    | 0.04% | 104  |

| Spearman Rank Correlation - all disciplines |        |
|---------------------------------------------|--------|
| coefficient (rs)                            | 0.807  |
| N                                           | 148    |
| T statistic                                 | 16.537 |
| DF                                          | 146    |
| p-value                                     | 0.000  |

| Spearman Rank Correlation - top 50 disciplines |       |
|------------------------------------------------|-------|
| coefficient (rs)                               | 0.738 |
| N                                              | 50    |
| T statistic                                    | 7.588 |
| DF                                             | 48    |
| p-value                                        | 0.000 |

**Table S2: Major countries for COVID articles and non-COVID (control) articles and concordance statistics**

| Country (First Author) | Non-COVID |        |      | COVID  |        |      | Total   |        |      |
|------------------------|-----------|--------|------|--------|--------|------|---------|--------|------|
|                        | Total     | %      | Rank | Total  | %      | Rank | Total   | %      | Rank |
| United States          | 120,478   | 26.65% | 1    | 11,066 | 26.12% | 1    | 131,544 | 26.75% | 1    |
| Italy                  | 22,670    | 5.01%  | 5    | 4,309  | 10.15% | 2    | 26,979  | 5.49%  | 4    |
| United Kingdom         | 27,994    | 6.19%  | 3    | 3,157  | 8.13%  | 3    | 31,151  | 6.33%  | 2    |
| India                  | 11,388    | 2.52%  | 12   | 1,778  | 7.43%  | 4    | 13,166  | 2.68%  | 12   |
| Spain                  | 15,273    | 3.38%  | 9    | 1,672  | 4.19%  | 5    | 16,945  | 3.45%  | 9    |
| China                  | 29,078    | 6.43%  | 2    | 1,377  | 3.77%  | 6    | 30,455  | 6.19%  | 3    |
| Canada                 | 16,654    | 3.68%  | 7    | 1,324  | 3.11%  | 7    | 17,978  | 3.66%  | 7    |
| France                 | 13,837    | 3.06%  | 10   | 1,313  | 3.02%  | 8    | 15,150  | 3.08%  | 10   |
| Germany                | 24,413    | 5.40%  | 4    | 1,161  | 2.64%  | 9    | 25,574  | 5.20%  | 5    |
| Brasil                 | 13,219    | 2.92%  | 11   | 1,160  | 2.64%  | 10   | 14,379  | 2.92%  | 11   |
| Australia              | 16,132    | 3.57%  | 8    | 1,052  | 2.50%  | 11   | 17,184  | 3.49%  | 8    |
| Iran                   | 6,757     | 1.49%  | 15   | 878    | 2.07%  | 12   | 7,635   | 1.55%  | 14   |
| Turkey                 | 6,134     | 1.36%  | 18   | 851    | 1.97%  | 13   | 6,985   | 1.42%  | 16   |
| Japan                  | 18,952    | 4.19%  | 6    | 499    | 1.30%  | 14   | 19,451  | 3.96%  | 6    |
| Netherlands            | 9,702     | 2.15%  | 13   | 425    | 1.24%  | 15   | 10,127  | 2.06%  | 13   |
| Switzerland            | 6,455     | 1.43%  | 16   | 422    | 1.00%  | 16   | 6,877   | 1.40%  | 17   |
| Singapore              | 1,823     | 0.40%  | 36   | 405    | 0.99%  | 17   | 2,228   | 0.45%  | 32   |
| Israel                 | 3,813     | 0.84%  | 22   | 378    | 0.96%  | 18   | 4,191   | 0.85%  | 22   |
| Saudi Arabia           | 2,020     | 0.45%  | 33   | 341    | 0.96%  | 19   | 2,361   | 0.48%  | 30   |
| Greece                 | 2,605     | 0.58%  | 27   | 323    | 0.86%  | 20   | 2,928   | 0.60%  | 26   |
| Belgium                | 4,132     | 0.91%  | 21   | 314    | 0.82%  | 21   | 4,446   | 0.90%  | 21   |
| Pakistan               | 1,769     | 0.39%  | 38   | 286    | 0.80%  | 22   | 2,055   | 0.42%  | 36   |
| Mexico                 | 3,186     | 0.70%  | 24   | 281    | 0.74%  | 23   | 3,467   | 0.71%  | 24   |
| Egypt                  | 2,541     | 0.56%  | 28   | 254    | 0.71%  | 24   | 2,795   | 0.57%  | 28   |
| Poland                 | 6,318     | 1.40%  | 17   | 253    | 0.66%  | 25   | 6,571   | 1.34%  | 18   |
| Hong Kong              | 1,285     | 0.28%  | 41   | 248    | 0.63%  | 26   | 1,533   | 0.31%  | 41   |
| Ireland                | 2,100     | 0.46%  | 31   | 230    | 0.59%  | 27   | 2,330   | 0.47%  | 31   |
| Austria                | 3,313     | 0.73%  | 23   | 203    | 0.58%  | 28   | 3,516   | 0.71%  | 23   |
| South Korea            | 7,400     | 1.64%  | 14   | 199    | 0.52%  | 29   | 7,599   | 1.55%  | 15   |
| Sweden                 | 5,841     | 1.29%  | 19   | 192    | 0.45%  | 30   | 6,033   | 1.23%  | 19   |
| Bangladesh             | 318       | 0.07%  | 60   | 154    | 0.45%  | 31   | 472     | 0.10%  | 55   |
| Portugal               | 3,007     | 0.67%  | 25   | 151    | 0.36%  | 32   | 3,158   | 0.64%  | 25   |
| Denmark                | 4,599     | 1.02%  | 20   | 143    | 0.35%  | 33   | 4,742   | 0.96%  | 20   |
| South Africa           | 1,771     | 0.39%  | 37   | 142    | 0.35%  | 34   | 1,913   | 0.39%  | 38   |
| United Arab Emirates   | 532       | 0.12%  | 51   | 129    | 0.34%  | 35   | 661     | 0.13%  | 50   |
| Colombia               | 869       | 0.19%  | 45   | 120    | 0.33%  | 36   | 989     | 0.20%  | 45   |
| Chile                  | 1,520     | 0.34%  | 40   | 114    | 0.29%  | 37   | 1,634   | 0.33%  | 40   |
| Taiwan                 | 2,101     | 0.46%  | 30   | 112    | 0.27%  | 38   | 2,213   | 0.45%  | 33   |
| Norway                 | 2,812     | 0.62%  | 26   | 106    | 0.26%  | 39   | 2,918   | 0.59%  | 27   |
| Malaysia               | 1,224     | 0.27%  | 42   | 94     | 0.25%  | 40   | 1,318   | 0.27%  | 42   |
| Peru                   | 346       | 0.08%  | 58   | 93     | 0.22%  | 41   | 439     | 0.09%  | 56   |
| Argentina              | 1,739     | 0.38%  | 39   | 89     | 0.20%  | 42   | 1,828   | 0.37%  | 39   |
| Romania                | 1,142     | 0.25%  | 43   | 84     | 0.20%  | 43   | 1,226   | 0.25%  | 43   |
| Russia                 | 2,083     | 0.46%  | 32   | 83     | 0.20%  | 44   | 2,166   | 0.44%  | 34   |
| Lebanon                | 679       | 0.15%  | 49   | 82     | 0.20%  | 45   | 761     | 0.15%  | 49   |
| New Zealand            | 2,011     | 0.44%  | 34   | 80     | 0.19%  | 46   | 2,091   | 0.43%  | 35   |
| Nigeria                | 501       | 0.11%  | 52   | 75     | 0.19%  | 47   | 576     | 0.12%  | 52   |
| Indonesia              | 289       | 0.06%  | 64   | 73     | 0.17%  | 48   | 362     | 0.07%  | 60   |
| Jordan                 | 345       | 0.08%  | 59   | 68     | 0.17%  | 49   | 413     | 0.08%  | 58   |
| Morocco                | 304       | 0.07%  | 63   | 66     | 0.17%  | 50   | 370     | 0.08%  | 59   |

**Spearman Rank Correlation - all countries**

|                  |       |
|------------------|-------|
| coefficient (rs) | 0.93  |
| N                | 167   |
| T statistic      | 32.32 |
| DF               | 165   |
| p-value          | 0.000 |

**Spearman Rank Correlation - top 50 countries**

|                  |       |
|------------------|-------|
| coefficient (rs) | 0.85  |
| N                | 50    |
| T statistic      | 10.97 |
| DF               | 48    |
| p-value          | 0.000 |

**Table S3:** Hierarchical linear probability model for the likelihood of women first authorship for COVID articles versus non-COVID (control) articles

| <i>Dependent variable: First Author Female</i> | (1)                        | (2)                        | (3)                        | (4)                        | (5)                        |
|------------------------------------------------|----------------------------|----------------------------|----------------------------|----------------------------|----------------------------|
| <b>COVID</b>                                   | <b>-0.074***</b><br>(0.00) | <b>-0.074***</b><br>(0.00) | <b>-0.075***</b><br>(0.00) | <b>-0.086***</b><br>(0.00) | <b>-0.089***</b><br>(0.00) |
| number of authors                              |                            | 0.002***<br>(0.00)         | 0.002***<br>(0.00)         | 0.002***<br>(0.00)         | 0.002***<br>(0.00)         |
| publication month fixed effects (12)           |                            |                            | Included                   | Included                   | Included                   |
| discipline fixed effects (148)                 |                            |                            |                            | Included                   | Included                   |
| country fixed effects (167)                    |                            |                            |                            |                            | Included                   |
| constant                                       | 0.451***<br>(0.00)         | 0.442***<br>(0.00)         | 0.454***<br>(0.00)         | 0.269***<br>(0.02)         | 0.036<br>(0.10)            |
| R-squared                                      | 0.002                      | 0.002                      | 0.002                      | 0.043                      | 0.060                      |
| Adjusted R-squared                             | 0.002                      | 0.002                      | 0.002                      | 0.043                      | 0.059                      |
| Observations                                   | 526,130                    | 526,130                    | 526,130                    | 526,130                    | 491,912                    |

Note: standard errors in brackets, \*  $p < 0.05$ , \*\*  $p < 0.01$ , \*\*\*  $p < 0.001$



**Table S4:** Hierarchical linear probability model for the likelihood of women last authorship for COVID articles versus non-COVID (control) articles

| <i>Dependent variable: Last Author Female</i> | (1)              | (2)              | (3)              | (4)              | (5)              |
|-----------------------------------------------|------------------|------------------|------------------|------------------|------------------|
| <b>COVID</b>                                  | <b>-0.014***</b> | <b>-0.014***</b> | <b>-0.015***</b> | <b>-0.033***</b> | <b>-0.037***</b> |
|                                               | <b>(0.00)</b>    | <b>(0.00)</b>    | <b>(0.00)</b>    | <b>(0.00)</b>    | <b>(0.00)</b>    |
| number of authors                             |                  | -0.002***        | -0.002***        | -0.001***        | -0.001***        |
|                                               |                  | (0.00)           | (0.00)           | (0.00)           | (0.00)           |
| publication month fixed effects (12)          |                  |                  | Included         | Included         | Included         |
| discipline fixed effects (148)                |                  |                  |                  | Included         | Included         |
| country fixed effects (167)                   |                  |                  |                  |                  | Included         |
| constant                                      | 0.319***         | 0.332***         | 0.342***         | 0.232***         | 0.081            |
|                                               | (0.00)           | (0.00)           | (0.00)           | (0.02)           | (0.09)           |
| R-squared                                     | 0.000            | 0.001            | 0.001            | 0.043            | 0.060            |
| Adjusted R-squared                            | 0.000            | 0.001            | 0.001            | 0.043            | 0.059            |
| Observations                                  | 539,103          | 539,103          | 539,103          | 539,103          | 504,148          |

Note: standard errors in brackets, \*  $p < 0.05$ , \*\*  $p < 0.01$ , \*\*\*  $p < 0.001$

**Table S5:** Hierarchical logit regression for the likelihood of women first authorship for COVID articles versus non-COVID (control) articles

| <i>Dependent variable: First Author Female</i> | (1)                              | (2)                              | (3)                              | (4)                              | (5)                              |
|------------------------------------------------|----------------------------------|----------------------------------|----------------------------------|----------------------------------|----------------------------------|
| <b>COVID</b>                                   | <b>0.738***</b><br><b>(0.01)</b> | <b>0.737***</b><br><b>(0.01)</b> | <b>0.733***</b><br><b>(0.01)</b> | <b>0.690***</b><br><b>(0.01)</b> | <b>0.678***</b><br><b>(0.01)</b> |
| number of authors                              |                                  | 1.006***<br>(0.00)               | 1.006***<br>(0.00)               | 1.009***<br>(0.00)               | 1.009***<br>(0.00)               |
| publication month fixed effects (12)           |                                  |                                  | Included                         | Included                         | Included                         |
| discipline fixed effects (148)                 |                                  |                                  |                                  | Included                         | Included                         |
| country fixed effects (167)                    |                                  |                                  |                                  |                                  | Included                         |
| constant                                       | 0.821***<br>(0.00)               | 0.790***<br>(0.00)               | 0.829***<br>(0.01)               | 0.365***<br>(0.03)               | 0.117***<br>(0.06)               |
| observations                                   | 526,130                          | 526,130                          | 526,130                          | 526,112                          | 491,837                          |

Note: Coefficients reported as odds ratios, standard errors in brackets, \*  $p < 0.05$ , \*\*  $p < 0.01$ , \*\*\*  $p < 0.001$

**Table S6: Robustness checks**

| <i>Dependent variable: First Author Female</i> | Accuracy of gender designation > 50% | Accuracy of gender designation = 100% | Excluding collective authorships | Full sample      |
|------------------------------------------------|--------------------------------------|---------------------------------------|----------------------------------|------------------|
|                                                | (1)                                  | (2)                                   | (3)                              | (4)              |
| <b>COVID</b>                                   | <b>-0.082***</b>                     | <b>-0.090***</b>                      | <b>-0.089***</b>                 | <b>-0.079***</b> |
|                                                | <b>(0.00)</b>                        | <b>(0.00)</b>                         | <b>(0.00)</b>                    | <b>(0.00)</b>    |
| number of authors                              | 0.002***                             | 0.002***                              | 0.003***                         | 0.002***         |
|                                                | (0.00)                               | (0.00)                                | (0.00)                           | (0.00)           |
| publication month fixed effects (12)           | Included                             | Included                              | Included                         | Included         |
| discipline fixed effects (148)                 | Included                             | Included                              | Included                         | Included         |
| country fixed effects (167)                    | Included                             | Included                              | Included                         |                  |
| journal fixed effects (5,101)                  |                                      |                                       |                                  | Included         |
| constant                                       | 0.095                                | 0.040                                 | 0.031                            | 0.215*           |
|                                                | (0.10)                               | (0.10)                                | (0.10)                           | (0.10)           |
| R-squared                                      | 0.049                                | 0.067                                 | 0.060                            | 0.091            |
| Adjusted R-squared                             | 0.048                                | 0.066                                 | 0.059                            | 0.082            |
| Observations                                   | 607,598                              | 443,711                               | 483,308                          | 507,653          |

Note: standard errors in brackets, \* p < 0.05, \*\* p < 0.01, \*\*\* p < 0.001

**Table S7:** Descriptive statistics of articles included in the analysis versus articles not included in the analysis

| Variable            | Included in analysis |           | Excluded from analysis |           | t-test        |             |
|---------------------|----------------------|-----------|------------------------|-----------|---------------|-------------|
|                     | Mean                 | Std. Dev. | Mean                   | Std. Dev. | Difference    | t-statistic |
| First Author Female | 0.38                 | 0.48      | 0.38                   | 0.49      | 0.00          | 0.45        |
| Last Author Female  | 0.32                 | 0.47      | 0.33                   | 0.47      | 0.01          | 2.27        |
| Publication Month   | 7.35                 | 3.15      | 7.51                   | 3.25      | 0.15          | 5.35        |
| Number of Authors   | 6.42                 | 8.56      | 5.75                   | 6.25      | -0.68         | -10.76      |
| North America       | 0.29                 | 0.45      | 0.24                   | 0.43      | -0.05         | -12.70      |
| Europe              | 0.35                 | 0.48      | 0.28                   | 0.45      | 0.07          | -16.15      |
| Asia                | 0.19                 | 0.39      | 0.23                   | 0.42      | 0.04          | 9.69        |
| Latin America       | 0.05                 | 0.21      | 0.04                   | 0.20      | 0.00          | -1.44       |
| Oceania             | 0.03                 | 0.16      | 0.02                   | 0.14      | -0.01         | -4.22       |
| Africa              | 0.02                 | 0.14      | 0.03                   | 0.17      | 0.01          | 6.20        |
| <b>Observations</b> | <b>42,898</b>        |           | <b>17,445</b>          |           | <b>60,343</b> |             |

## STROBE Statement—checklist of items that should be included in reports of observational studies

|                           | Item No. | Recommendation                                                                                                                                                                                                                                                                                                                                                                                                                                                         | Page No. | Relevant text from manuscript                                                                                 |
|---------------------------|----------|------------------------------------------------------------------------------------------------------------------------------------------------------------------------------------------------------------------------------------------------------------------------------------------------------------------------------------------------------------------------------------------------------------------------------------------------------------------------|----------|---------------------------------------------------------------------------------------------------------------|
| <b>Title and abstract</b> | 1        | (a) Indicate the study's design with a commonly used term in the title or the abstract                                                                                                                                                                                                                                                                                                                                                                                 | 1        | Longitudinal analyses                                                                                         |
|                           |          | (b) Provide in the abstract an informative and balanced summary of what was done and what was found                                                                                                                                                                                                                                                                                                                                                                    | 1        | Widening gender gap in productivity with COVID                                                                |
| <b>Introduction</b>       |          |                                                                                                                                                                                                                                                                                                                                                                                                                                                                        |          |                                                                                                               |
| Background/rationale      | 2        | Explain the scientific background and rationale for the investigation being reported                                                                                                                                                                                                                                                                                                                                                                                   | 2        | COVID impact on productivity                                                                                  |
| Objectives                | 3        | State specific objectives, including any prespecified hypotheses                                                                                                                                                                                                                                                                                                                                                                                                       | 2        | Gendered productivity drain                                                                                   |
| <b>Methods</b>            |          |                                                                                                                                                                                                                                                                                                                                                                                                                                                                        |          |                                                                                                               |
| Study design              | 4        | Present key elements of study design early in the paper                                                                                                                                                                                                                                                                                                                                                                                                                | 3        | COVID as exogenous shock                                                                                      |
| Setting                   | 5        | Describe the setting, locations, and relevant dates, including periods of recruitment, exposure, follow-up, and data collection                                                                                                                                                                                                                                                                                                                                        | 2        | Longitudinal case-control design                                                                              |
| Participants              | 6        | (a) <i>Cohort study</i> —Give the eligibility criteria, and the sources and methods of selection of participants. Describe methods of follow-up<br><i>Case-control study</i> —Give the eligibility criteria, and the sources and methods of case ascertainment and control selection. Give the rationale for the choice of cases and controls<br><i>Cross-sectional study</i> —Give the eligibility criteria, and the sources and methods of selection of participants | 3        | COVID publications (Feb 20 to Jan 21) as cases versus publications in same journals a year earlier (controls) |
|                           |          | (b) <i>Cohort study</i> —For matched studies, give matching criteria and number of exposed and unexposed<br><i>Case-control study</i> —For matched studies, give matching criteria and the number of controls per case                                                                                                                                                                                                                                                 |          |                                                                                                               |
| Variables                 | 7        | Clearly define all outcomes, exposures, predictors, potential confounders, and effect modifiers. Give diagnostic criteria, if applicable                                                                                                                                                                                                                                                                                                                               | 7        | Absolute percentage point gender difference in authorship                                                     |
| Data sources/measurement  | 8*       | For each variable of interest, give sources of data and details of methods of assessment (measurement). Describe comparability of assessment methods if there is more than one group                                                                                                                                                                                                                                                                                   | 6        | PubMed, Clarivate JCR, Genderize.io                                                                           |
| Bias                      | 9        | Describe any efforts to address potential sources of bias                                                                                                                                                                                                                                                                                                                                                                                                              | 6/7      | Case-control design, sensitivity analyses                                                                     |
| Study size                | 10       | Explain how the study size was arrived at                                                                                                                                                                                                                                                                                                                                                                                                                              | 7        | Population of PubMed articles                                                                                 |

|                        |     |                                                                                                                                                                                                                                                                                                           |            |                                                              |
|------------------------|-----|-----------------------------------------------------------------------------------------------------------------------------------------------------------------------------------------------------------------------------------------------------------------------------------------------------------|------------|--------------------------------------------------------------|
| Quantitative variables | 11  | Explain how quantitative variables were handled in the analyses. If applicable, describe which groupings were chosen and why                                                                                                                                                                              |            | Statistical Software<br>Stata                                |
| Statistical methods    | 12  | (a) Describe all statistical methods, including those used to control for confounding                                                                                                                                                                                                                     | 6/7        | Descriptive and parametric analyses                          |
|                        |     | (b) Describe any methods used to examine subgroups and interactions                                                                                                                                                                                                                                       | 6          | Discipline and Country                                       |
|                        |     | (c) Explain how missing data were addressed                                                                                                                                                                                                                                                               | Supplement | Exclusion plus sensitivities                                 |
|                        |     | (d) <i>Cohort study</i> —If applicable, explain how loss to follow-up was addressed<br><i>Case-control study</i> —If applicable, explain how matching of cases and controls was addressed<br><i>Cross-sectional study</i> —If applicable, describe analytical methods taking account of sampling strategy |            | N/A                                                          |
|                        |     | (e) Describe any sensitivity analyses                                                                                                                                                                                                                                                                     | 7          | Full sample and subgroup testing                             |
| <b>Results</b>         |     |                                                                                                                                                                                                                                                                                                           |            |                                                              |
| Participants           | 13* | (a) Report numbers of individuals at each stage of study—eg numbers potentially eligible, examined for eligibility, confirmed eligible, included in the study, completing follow-up, and analysed                                                                                                         | 7          | 42,898 COVID articles (cases)<br>483,232 control articles    |
|                        |     | (b) Give reasons for non-participation at each stage                                                                                                                                                                                                                                                      |            | N/A                                                          |
|                        |     | (c) Consider use of a flow diagram                                                                                                                                                                                                                                                                        | Supplement |                                                              |
| Descriptive data       | 14* | (a) Give characteristics of study participants (eg demographic, clinical, social) and information on exposures and potential confounders                                                                                                                                                                  | 6          | COVID pandemic as exposure, gender of first and last authors |
|                        |     | (b) Indicate number of participants with missing data for each variable of interest                                                                                                                                                                                                                       |            | N/A                                                          |
|                        |     | (c) <i>Cohort study</i> —Summarise follow-up time (eg, average and total amount)                                                                                                                                                                                                                          |            | N/A                                                          |
| Outcome data           | 15* | <i>Cohort study</i> —Report numbers of outcome events or summary measures over time                                                                                                                                                                                                                       |            |                                                              |
|                        |     | <i>Case-control study</i> —Report numbers in each exposure category, or summary measures of exposure                                                                                                                                                                                                      | 9          | Gender gap 9.8 percentage points (54.9% men vs 45.1% women)  |
|                        |     | <i>Cross-sectional study</i> —Report numbers of outcome events or summary measures                                                                                                                                                                                                                        |            |                                                              |
| Main results           | 16  | (a) Give unadjusted estimates and, if applicable, confounder-adjusted estimates and their precision (eg, 95% confidence interval). Make clear which confounders were adjusted for and why they were included                                                                                              | 9          | See 15.                                                      |
|                        |     | (b) Report category boundaries when continuous variables were categorized                                                                                                                                                                                                                                 |            | N/A                                                          |

|                          |    |                                                                                                                                                                            |       |                                                                                                                          |
|--------------------------|----|----------------------------------------------------------------------------------------------------------------------------------------------------------------------------|-------|--------------------------------------------------------------------------------------------------------------------------|
| Other analyses           | 17 | Report other analyses done—eg analyses of subgroups and interactions, and sensitivity analyses                                                                             | 9-12  | Discipline and country analyses                                                                                          |
| <b>Discussion</b>        |    |                                                                                                                                                                            |       |                                                                                                                          |
| Key results              | 18 | Summarise key results with reference to study objectives                                                                                                                   | 13    | Acute increase in gender gap early 2020 with longitudinal reversion                                                      |
| Limitations              | 19 | Discuss limitations of the study, taking into account sources of potential bias or imprecision. Discuss both direction and magnitude of any potential bias                 | 16    | Focus on COVID research, probabilistic gender designation                                                                |
| Interpretation           | 20 | Give a cautious overall interpretation of results considering objectives, limitations, multiplicity of analyses, results from similar studies, and other relevant evidence | 13/14 | Confirming acute increase in gender gap, new longitudinal findings                                                       |
| Generalisability         | 21 | Discuss the generalisability (external validity) of the study results                                                                                                      | 16    | Applies to COVID research, likely with external validity                                                                 |
| <b>Other information</b> |    |                                                                                                                                                                            |       |                                                                                                                          |
| Funding                  | 22 | Give the source of funding and the role of the funders for the present study and, if applicable, for the original study on which the present article is based              | 20    | Office of the Director, National Institutes of Health (1DP5OD017897, Dr. Jena). The funding sources had no role in study |

\*Give information separately for cases and controls in case-control studies and, if applicable, for exposed and unexposed groups in cohort and cross-sectional studies.

**Note:** An Explanation and Elaboration article discusses each checklist item and gives methodological background and published examples of transparent reporting. The STROBE checklist is best used in conjunction with this article (freely available on the Web sites of PLoS Medicine at <http://www.plosmedicine.org/>, Annals of Internal Medicine at <http://www.annals.org/>, and Epidemiology at <http://www.epidem.com/>). Information on the STROBE Initiative is available at [www.strobe-statement.org](http://www.strobe-statement.org).
